1 Title:

2 ***foxQ2* evolved a key role in anterior head and central brain patterning in**  
3 **protostomes**

4

5 Authors:

6 Peter Kitzmann<sup>1</sup>, Matthias Weißkopf<sup>2</sup>, Magdalena Ines Schacht<sup>1</sup>, Gregor Bucher<sup>1</sup>

7

8 Affiliation:

9 <sup>1</sup> Department of Evolutionary Developmental Genetics, Johann-Friedrich-Blumenbach-Institute,  
10 GZMB, Georg-August-University, Göttingen Campus, Justus von Liebig Weg 11, 37077 Göttingen

11 <sup>2</sup> Department of Biology, Division of Developmental Biology, Friedrich-Alexander-University of  
12 Erlangen-Nürnberg, Erlangen, Germany

13

14 The authors declare no competing interests.

15

16 Funding:

17 Deutsche Forschungsgemeinschaft (DFG)

18 Göttingen Graduate School for Neurosciences, Biophysics, and Molecular Biosciences (GGNB)

## 19 Abstract

20 Anterior patterning of animals is based on a set of highly conserved transcription factors but the  
21 interactions within the protostome anterior gene regulatory network (aGRN) remain enigmatic. Here,  
22 we identify the *foxQ2* ortholog of the red flour beetle *Tribolium castaneum* as novel upstream  
23 component of the insect aGRN. It is required for the development of the labrum and higher order  
24 brain structures, namely the central complex and the mushroom bodies. We reveal *Tc-foxQ2*  
25 interactions by RNAi and heat shock-mediated misexpression. Surprisingly, *Tc-foxQ2* and *Tc-six3*  
26 mutually activate each other forming a novel regulatory module at the top of the insect aGRN.  
27 Comparisons of our results with those of sea urchins and cnidarians suggest that *foxQ2* has acquired  
28 functions in head and brain patterning during protostome evolution. Our findings expand the  
29 knowledge on *foxQ2* gene function to include essential roles in epidermal development and central  
30 brain patterning.

31

## 32 Author summary

33 The development of the anterior most part of any animal embryo – for instance the brain of  
34 vertebrates and the head of insects – depends on a very similar set of genes present in all animals.  
35 This is true for the two major lineages of bilaterian animals, the deuterostomes (including sea urchin  
36 and humans) and protostomes (including annelids and insects) and the cnidarians (e.g. the sea  
37 anemone), which are representatives of more ancient animals. However, the interaction of these  
38 genes has been studied in deuterostomes and cnidarians but not in protostomes. Here, we present  
39 the first study the function of the gene *foxQ2* in protostomes. We found that the gene acts at the top  
40 level of the genetic network and when its function is knocked down, the labrum (a part of the head)  
41 and higher order brain centers do not develop. This is in contrast to the other animal groups where

42 *foxQ2* appears to play a less central role. We conclude that *foxQ2* has acquired additional functions  
43 in the course of evolution of protostomes.

44

## 45 Introduction

46 Anterior patterning in bilaterian animals is based on a set of highly conserved transcription factors  
47 like *orthodenticle/otx*, *empty spiracles/emx*, *eyeless/Pax6* and other genes, which have comparable  
48 expression and function from flies to mice (Hirth et al., 1995; Leuzinger et al., 1998; Quiring et al.,  
49 1994; Simeone et al., 1992). Likewise, canonical Wnt signaling needs to be repressed in order to  
50 allow anterior pattern formation in most tested animals with *Drosophila* being a notable exception  
51 (Fu et al., 2012; Martin and Kimelman, 2009; Petersen and Reddien, 2009). Since recently, additional  
52 genes have been studied, which are expressed anterior to the *orthodenticle/otx* region at the  
53 anterior pole of embryos of all major clades of Bilateria and their sister group, the Cnidaria. These  
54 data suggested that a distinct but highly conserved anterior gene regulatory network (aGRN) governs  
55 anterior-most patterning (Lowe et al., 2003; Marlow et al., 2014; Posnien et al., 2011b; Sinigaglia et  
56 al., 2013; Steinmetz et al., 2010; Yaguchi et al., 2008). This region gives rise to the apical organ in sea  
57 urchins, annelids and hemichordates and other structures. Most of the respective orthologs were  
58 shown to be expressed in the vertebrate anterior neural plate and the anterior insect head as well  
59 (Posnien et al., 2011b) although it remains disputed what tissue-if any-is homologous to the apical  
60 organ in these species (Hunnekuhl and Akam, 2014; Marlow et al., 2014; Santagata et al., 2012;  
61 Sinigaglia et al., 2013; Telford et al., 2008). Unfortunately, detailed interactions of this aGRN were  
62 determined only in a few model systems (Range and Wei, 2016; Sinigaglia et al., 2013; Yaguchi et al.,  
63 2008).

64 The aGRN of sea urchins as representative of deuterostomes is best studied in *Strongylocentrotus*  
65 *purpuratus* and *Hemicentrotus pulcherrimus*. Data indicate that sea urchin *six3* is the most upstream  
66 regulator, which is initially co-expressed with *foxQ2*. Both genes are restricted to the anterior pole by  
67 repression by posterior Wnt signaling (Range and Wei, 2016; Wei et al., 2009; Yaguchi et al., 2008).  
68 *six3* in turn is able to repress Wnt signaling (Wei et al., 2009) and to activate a large number of genes  
69 including *rx*, *nk2.1* and *foxQ2* (Wei et al., 2009). Subsequently, *foxQ2* represses *six3* but activates  
70 *nk2.1* expression at the anterior-most tip. In this tissue freed of *six3* expression *foxQ2* is responsible  
71 for establishing a signaling center involved in the differentiation of the apical organ (Range and Wei,  
72 2016). In addition, *foxQ2* expression is positively regulated by nodal signaling (Yaguchi et al., 2016).  
73 *six3* knockdown leads to a strong morphological phenotype including change of embryonic epidermal  
74 shape and loss of neural cells (Wei et al., 2009). In *foxQ2* knockdown, in contrast, an epidermal  
75 phenotype other than epidermal animal plate thickening was not observed (Yaguchi et al., 2008). In  
76 contrast, *foxQ2* appears to be essential for the specification of specific neural cell types (Yaguchi et  
77 al., 2008; Yaguchi et al., 2012; Yaguchi et al., 2016).

78 The *Nematostella vectensis* (Cnidaria) aGRN has been studied representing the sister group to  
79 bilaterian animals (Sinigaglia et al., 2013). Both *Nv-six3* and *Nv-foxQ2* are repressed by posterior Wnt  
80 signaling and *Nv-six3* activates *Nv-foxQ2* and a number of other genes of the aGRN (Marlow et al.,  
81 2013; Sinigaglia et al., 2013). Like in the sea urchin, knockdown of *Nv-six3* leads to strong  
82 morphological defects including loss of the apical organ while *Nv-foxQ2* knockdown does not affect  
83 the morphology of the embryo but the apical organ is reduced (Sinigaglia et al., 2013). One notable  
84 difference of the aGRN is that *Nv-foxQ2* does not appear to regulate *Nv-six3*. The repression of *six3*  
85 and *foxQ2* by Wnt signaling has been confirmed in a hemichordate (deuterostome) (Darras et al.,  
86 2011; Fritzenwanker et al., 2014) and for *foxQ2* in a hydrozoan (cnidarian) (Momose et al., 2008).  
87 Neither sea urchins nor cnidarians possess a highly developed CNS such that a function of *foxQ2* in  
88 brain development could not be tested.

89 Within protostomes, the expression of aGRN genes has been studied extensively in postembryonic  
90 stages of the annelid *Platynereis dumerilii* (Lophotrochozoa) but the only functional interaction  
91 tested is the repression of *Pd-six3* and *Pd-foxQ2* by Wnt signaling (Marlow et al., 2014). Within  
92 arthropods (Ecdysozoa) the red flour beetle *Tribolium castaneum* has become the main model  
93 system for studying anterior patterning (Posnien et al., 2010), because head development is more  
94 representative for insects than the involuted head of *Drosophila*. Indeed, the respective aGRNs differ  
95 significantly. The anterior morphogen *bicoid* is present only in higher dipterans while the canonical  
96 anterior repression of Wnt signaling is observed in *Tribolium* only (Brown et al., 2001; Stauber et al.,  
97 1999). Neither terminal Torso signaling nor the terminal gap gene *huckebein* have an influence on  
98 head formation in *Tribolium* (Schoppmeier and Schröder, 2005; Kittelmann et al., 2013). Apparently,  
99 there are two anterior patterning systems – one with a high degree of similarity with vertebrate  
100 neural plate patterning and another comprised by a different set of genes patterning the largely non-  
101 neural anterior median region (AMR) (Kittelmann et al., 2013; Posnien et al., 2011b). Interestingly,  
102 *Tc-six3* is a central regulator of anterior head and brain patterning, which is repressing *Tc-wg*  
103 expression (i.e. Wnt signaling) among other genes but is not regulating *Tc-rx* and *Tc-nk2.1* (Posnien et  
104 al., 2011b).

105 In an ongoing genome-wide RNAi screen in *Tribolium* (iBeetle screen) (Dönitz et al., 2015; Schmitt-  
106 Engel et al., 2015) a head phenotype similar to the one of *Tc-six3* was induced by the dsRNA  
107 fragment *iB\_03837*. The targeted gene was the *Tribolium* ortholog of FoxQ2 (*Tc-foxQ2*), which is a  
108 Forkhead transcription factor. All members of this family share the Forkhead DNA-binding domain  
109 and they are involved in development and disease (Benayoun et al., 2011). While being highly  
110 conserved among animals, this gene was lost from placental mammals (Mazet et al., 2003; Yu et al.,  
111 2008). Within arthropods, anterior expression was described for the *Drosophila* ortholog *fd102C*  
112 (*CG11152*) (Lee and Frasch, 2004) and *Strigamia maritima* (myriapod) *foxQ2* (Hunnekuhl and Akam,  
113 2014). However, the function of this gene has not been studied in any protostome so far.

114 We studied expression and function of *Tc-foxQ2* by RNAi and heat shock-mediated misexpression.  
115 We found that *Tc-foxQ2* has acquired a much more central role in the insect aGRN compared to sea  
116 urchin and cnidarians. Surprisingly, *Tc-foxQ2* and *Tc-six3* form a regulatory module with mutual  
117 activation contrasting the clear upstream role of *six3* in the other species. Another marked difference  
118 is that *Tc-foxQ2* knockdown led to a strong epidermal phenotype. Further, we found a novel role of  
119 *Tc-foxQ2* in insect central brain patterning. Specifically, it was required for the development of the  
120 mushroom bodies (MB) and the central complex (CX), both of which are higher order processing  
121 centers of the insect brain (Heisenberg, 2003; Pfeiffer and Homberg, 2014). Finally, we present the  
122 most comprehensive aGRN available for any protostome.

123

124

## 125 Results

### 126 *Tc-foxQ2* - a novel player in anterior head development of *Tribolium*

127 In the iBeetle screen, injection of the dsRNA fragment *iB\_03837* led to first instar larval cuticles with  
128 reduced or absent labrum with high penetrance (Dönitz et al., 2015; Schmitt-Engel et al., 2015)  
129 (Fig. 1). The targeted gene was *TC004761* (Tcas\_OGS 3.0), which we determined by phylogenetic  
130 analysis to be the *Tribolium* ortholog of FoxQ2 (Tc-FoxQ2) (Fig. S1). Quantitative analyses of parental  
131 RNAi experiments with two non-overlapping dsRNA fragments (*Tc-foxQ2*<sup>RNAi\_a</sup>; *Tc-foxQ2*<sup>RNAi\_b</sup>;  
132 1.5 µg/µl) (Fig. 1A,B; Tables S1-4) in two different genetic backgrounds (Fig. S2; Tables S3-6) revealed  
133 the same morphological phenotype arguing against off-target effects or strong influence of the  
134 genetic background (Kitzmann et al., 2013). The proportions of eggs without cuticles or with cuticle  
135 remnants (*strong defects*) were within in the range observed in wild-type (wt). Weak *Tc-foxQ2* RNAi  
136 phenotypes showed a labrum reduced in size and loss of one or both labral setae (Fig. 1E,F; yellow

137 dots). Intermediate phenotypes were marked by a reduced labrum and loss of one or both anterior  
138 vertex triplet setae indicating additional deletions of the head capsule (Fig. 1E,G; red dots). In strong  
139 phenotypes, the labrum was strongly reduced or deleted along with several setae marking the  
140 anterior head and/or the labrum (Fig. 1H). No other specific L1 cuticle phenotypes were detected.  
141 We tested higher dsRNA concentrations (2  $\mu\text{g}/\mu\text{l}$  and 3.1  $\mu\text{g}/\mu\text{l}$ ; data not shown) as well as double  
142 RNAi using both dsRNA fragments together (*Tc-foxQ2*<sup>RNAi\_a</sup> and *Tc-foxQ2*<sup>RNAi\_b</sup>, each 1.5  $\mu\text{g}/\mu\text{l}$ ; data  
143 not shown). None of these variations resulted in a stronger cuticle phenotype. Taken together, *Tc-*  
144 *foxQ2* is required for epidermal patterning of anterior head structures. Interestingly, the RNAi  
145 phenotype was very similar to the one described for *Tc-six3* although the affected domain was a bit  
146 smaller the penetrance was lower (Posnien et al., 2011b).

147

#### 148 Increased apoptosis in *Tc-foxQ2* RNAi

149 The labrum is an appendage-like structure (Posnien et al., 2009a) and its outgrowth requires cell  
150 proliferation regulated by *Tc-serrate* (*Tc-ser*) (Siemanowski et al., 2015). We asked when the size of  
151 the labrum decreased after *Tc-foxQ2* RNAi and whether cell proliferation or cell death were involved.  
152 We found that the labral buds in *Tc-foxQ2*<sup>RNAi</sup> embryos were decreased from fully elongated germ  
153 band stages onwards (Fig. 2Aa`,Ab`) and they fused precociously (Fig. 2Ac`,Ad`). We found no  
154 regulation of *Tc-ser* by *Tc-foxQ2* (see below). Next, we quantified apoptosis in embryos (6-26 h after  
155 egg laying (AEL); Table S7) using an antibody detecting cleaved *Drosophila* death caspase-1 (Dcp-1)  
156 (Florentin and Arama, 2012). We quantified apoptotic cells in the labral region (region 1 in Fig. 2B)  
157 and a control region (region 3 in Fig. 2E). We found that fully elongated germ bands showed a six  
158 times increased number of apoptotic cells after *Tc-foxQ2* RNAi ( $p=0.00041$ ,  $n=15$ ; Fig. 2C) coinciding  
159 with the stage of morphological reduction. Hence, *Tc-foxQ2* prevents apoptosis in the growing  
160 labrum.

161

## 162 *Tc-foxQ2* is required for brain development

163 The phenotypic similarity to *Tc-six3*<sup>RNAi</sup> embryos (Posnien et al., 2011b) and the expression of *Tc-*  
164 *foxQ2* in neuroectodermal tissue (see below) prompted us to check for brain phenotypes. We  
165 performed parental RNAi in the background of the double transgenic *brainy* line, which marks glia  
166 and neurons (visualized in white and yellow in Fig. 3A-C, respectively) (Koniszewski et al., 2016). In  
167 the weakest phenotypes the medial lobes of the MBs were reduced and appeared to be medially  
168 fused (Fig. 3, compare cyan arrowheads in A,A' with B,B'; MBs marked in magenta). Further, the CB  
169 (part of the CX) was shortened (Fig. 3B,B', CB marked in yellow) and the brain hemispheres were  
170 slightly fused (Fig. 3, compare black arrowheads in B',C' with A'). In stronger phenotypes, the CB was  
171 clearly reduced in size and the MBs were not detectable anymore. Further, the brain hemispheres  
172 appeared fused at the midline (Fig. 3C,C'). We tested the MB phenotype by RNAi in the background  
173 of the transgenic *MB-green* line which marks MBs by EGFP (Koniszewski et al., 2016). We observed a  
174 similar range of MB body phenotypes (Fig. S3). In addition, we found misarranged MBs had lost their  
175 medial contact (Fig. S3, filled arrowheads). Noteworthy, the strength of epidermal and neural  
176 phenotypes correlated. Larvae with weak neural defects showed a decreased labrum, while strong  
177 neural phenotypes correlated with lack of the entire labrum. Taken together, we found *Tc-foxQ2* to  
178 be required for brain formation with the MBs, the CB (part of the CX) and the midline being strongly  
179 affected. Again, these defects are similar to those reported for *Tc-six3* loss-of-function (Posnien et al.,  
180 2011b).

## 181 Dynamic expression of *Tc-foxQ2* in the anterior head

182 The expression of *Tc-foxQ2* started in two domains at the anterior terminus of the germ rudiment  
183 (Fig. 4A,B). At late elongating germ band stages, the domains split into several subdomains in the



184 AMR like in the labrum anlagen (empty arrowhead in Fig. 4F,H) and domains lateral to the  
185 stomodeum (empty arrow in Fig. 4G,I). Besides, there are also domains in the neuroectoderm (e.g.  
186 white arrow in Fig. 4F,L; see approximate fate map in Fig. S4). Very weak staining in the ocular region  
187 was detected with the tyramide signal amplification (TSA) system (Fig. 4K). These data confirm the  
188 anterior expression of *foxQ2* orthologs found in other animals and is in line with its function in  
189 labrum and neural development.

190

191 We mapped the expression of *Tc-foxQ2* relative to other genes of the aGRN by double in situ  
192 hybridization in wt embryos (6-26 h AEL). Expression overlaps are marked with dashed lines in Figs 5  
193 & 6. First we tested for genes that were previously described to interact with *foxQ2* in other species  
194 (see introduction) or are required for labrum formation (Coulcher and Telford, 2012; Economou and  
195 Telford, 2009; Kittelmann et al., 2013; Posnien et al., 2009a; Posnien et al., 2011b). We found no  
196 overlap with *Tc-wingless/wnt1* (*Tc-wg*) expression until retraction, where the emerging stomodeal  
197 *Tc-wg* domain overlapped with *Tc-foxQ2* expression (Fig. 5A). In contrast, we found complete overlap  
198 with *Tc-six3* expression at early embryonic stages (Fig. 5B<sub>0</sub>), which developed into a mutually  
199 exclusive expression at intermediate elongating germ bands (Fig. 5B<sub>2</sub>). Afterwards, these genes  
200 remained expressed mutually exclusive apart from a small anterior median neuroectodermal region  
201 (lateral area marked in Fig. 5B<sub>3-6</sub>) and the labrum anlagen (median area marked in Fig. 5B<sub>5-6</sub>). These  
202 data are in agreement with the interactions described for sea urchin where *six3* initially activates  
203 *foxQ2* while at later stages *six3* gets repressed by *foxQ2* (see introduction). The later coexistence of  
204 mutually exclusive and co-expression domains along with the many different expression domains of  
205 *Tc-foxQ2* indicate a complex and region specific regulation. Early co-expression developing into  
206 partially overlapping expression patterns was observed for both *Tc-cap'n'collar* (*Tc-cnc*) and *Tc-*  
207 *scarecrow* (*Tc-scro/nk2.1*) (Fig. 5C-D). For *Tc-crocodile* (*Tc-croc*) a small overlap was observed, which

208 remained throughout development (Fig. 5E). (Coulcher and Telford, 2012; Economou and Telford,  
209 2009; Kittelmann et al., 2013; Posnien et al., 2011b).

210

211 *Tc-retinal homeobox (Tc-rx)* was expressed in a largely non-overlapping pattern apart from small  
212 domains in labrum and neuroectoderm at late stages (Fig. 6A). *Tc-chx* and *Tc-ser* start expression  
213 largely overlapping with *Tc-foxQ2* but later resolve to mainly non-overlapping patterns (Fig. 6B,E). *Tc-*  
214 *forkhead (Tc-fkh/foxA)* expression was essentially non-overlapping (Fig. 6C). *Tc-six4* marks a region  
215 with molecular similarity to the vertebrate placodes (Posnien et al., 2011a). No co-expression was  
216 observed until late stages where a small domain in the anterior median neuroectoderm expresses  
217 both genes (Fig. 6D). In summary, *Tc-foxQ2* expression indicated a central and dynamic role in the  
218 aGRN.

219

220 *Tc-foxQ2* is required for *Tc-six3* expression and is repressed by Wnt signaling

221 We wondered in how far the interactions of *foxQ2* in other species were conserved in *Tribolium*.  
222 Unexpectedly, *Tc-six3* expression was strongly reduced or absent in *Tc-foxQ2*<sup>RNAi</sup> germ rudiments  
223 (compare Fig. 7A<sub>1</sub> with B<sub>1</sub>), which contrasts the findings in cnidarians and sea urchins. At later stages  
224 *Tc-six3* expression emerged but was reduced in strength and size with respect to the median  
225 expression domain (Fig. 7B<sub>2-4</sub>; empty arrowheads). The lateral neuroectodermal domains appeared to  
226 be more sensitive to *Tc-foxQ2* knockdown and were strongly reduced or even absent at later stages  
227 (Fig. 7B<sub>2-4</sub>; arrows). Conversely, *Tc-foxQ2* was virtually absent in *Tc-six3* RNAi embryos (Fig. 7D<sub>1-4</sub>)  
228 indicating a conserved role of *Tc-six3* in *Tc-foxQ2* regulation. At early embryonic stages, *Tc-wg*  
229 expression was not altered in *Tc-foxQ2*<sup>RNAi</sup> (not shown). Likewise, *Tc-foxQ2* was not altered at early  
230 embryonic stages in *Tc-arr*<sup>RNAi</sup> embryos, where ligand dependent canonical Wnt signaling is inhibited

231 (Bolognesi et al., 2009). At later stages, however, the lateral neuroectodermal *Tc-foxQ2* domain was  
232 expanded in *Tc-arr*<sup>RNAi</sup> (white arrows in Fig. 7E<sub>2-4</sub>) indicating a repressive function. In contrast, a  
233 mutual activation of *Tc-foxQ2* with *Tc-wg* was found at these later stages in the developing labrum  
234 (empty arrows in Fig. 7E<sub>2-3</sub> and Fig. S6). In summary, in early embryos we found the expected  
235 activation of *Tc-foxQ2* by *Tc-six3* known from sea urchins and cnidarians. In contrast to these clades,  
236 however, *Tc-foxQ2* was required for *Tc-six3* expression. Based on *Tc-arr*<sup>RNAi</sup> results, early *Tc-foxQ2*  
237 expression appears to be independent of ligand dependent Wnt signaling.

238

### 239 *Tc-foxQ2* acts upstream in anterior AMR patterning

240 The anterior median region of the insect head (AMR) harbors the labrum and the stomodeum. *Tc-cnc*  
241 and *Tc-croc* are upstream factors required for anterior and posterior AMR patterning, respectively  
242 (Economou and Telford, 2009; Hunnekuhl and Akam, 2014; Kittelmann et al., 2013). The AMR  
243 expression domain of *Tc-cnc* in the labrum was strongly reduced after the knockdown of *Tc-foxQ2*  
244 (Fig. 8B<sub>1-4</sub>). Likewise, *Tc-croc* expression was affected but the reduction was restricted to the anterior  
245 boundary of expression (empty arrowheads in Fig. 8D<sub>1-4</sub>). Its posterior expression around the  
246 stomodeum was largely unchanged. Conversely, in *Tc-croc* and *Tc-cnc* RNAi we observed no  
247 alteration of *Tc-foxQ2* expression at early stages (not shown) indicating an upstream role of *Tc-*  
248 *foxQ2*. However, at later stages, expression of *Tc-foxQ2* was reduced in the labrum in both  
249 treatments (Fig. S7). Next, we tested the median AMR markers *Tc-scro/nk2.1* and *Tc-fkh*. *Tc-*  
250 *scro/nk2.1* was reduced anteriorly and laterally in *Tc-foxQ2*<sup>RNAi</sup> embryos in early elongating germ  
251 bands (Fig. 8F<sub>1</sub>, empty arrowhead) but its posterior aspects remained unchanged. In contrast to wt  
252 embryos, the stomodeal/labral expression remained connected to the lateral expression in  
253 neuroectoderm (Fig. 8F<sub>2-4</sub>; empty arrow). Conversely, *Tc-foxQ2* was not changed in early *Tc-*  
254 *scro/nk2.1*<sup>RNAi</sup> embryos (Fig. S7) while in later embryos, changes were observed. The expression of

255 the stomodeum marker *Tc-fkh* was not considerably altered in *Tc-foxQ2*<sup>RNAi</sup> embryos (Fig. S8) while  
256 later aspects of *Tc-foxQ2* expression were altered in *Tc-fkh* RNAi probably by indirect effects (Fig. S8).

257

258 The Notch pathway ligand *Tc-ser* and the ubiquitin ligase *Tc-mind bomb1* (*Tc-mib1*) are required for  
259 labrum development and knockdown of both lead to identical phenotypes (Siemanowski et al.,  
260 2015). However, we detected no difference in *Tc-ser* expression in *Tc-foxQ2*<sup>RNAi</sup> (not shown).

261 Conversely, in early and intermediate elongating *Tc-mib1*<sup>RNAi</sup> embryos only the lateral aspects of *Tc-*  
262 *foxQ2* expression appeared mildly decreased (Fig. S9) arguing against a strong interaction with the  
263 Notch pathway. At later stages, in contrast, some lateral and labral *Tc-foxQ2* expression domains  
264 were clearly reduced in *Tc-mib1*<sup>RNAi</sup> embryos. Taken together, these results demonstrated an  
265 upstream role of *Tc-foxQ2* in early anterior AMR patterning and they indicated that the later  
266 interactions of the aGRN are different from the early ones.

## 267 An upstream role of *foxQ2* in neuroectoderm patterning

268 The anterior median neuroectoderm is marked by the expression of several highly conserved  
269 transcription factors and harbors the anlagen of the insect head placode (Posnien et al., 2011a), the  
270 pars intercerebralis and the pars lateralis (Posnien et al., 2011b) (Fig. S4). Further, it corresponds to  
271 the region where in grasshoppers several neuroblasts arise, which are required for CX development  
272 (Boyan and Reichert, 2011). *Tc-chx* expression was completely lost in early elongating *Tc-foxQ2*<sup>RNAi</sup>  
273 germ bands (empty arrowhead in Fig. 9B<sub>1</sub>) and highly reduced at later stages (white arrows in  
274 Fig. 9B<sub>2-4</sub>). The *Tc-six4* domain was highly reduced in early *Tc-foxQ2*<sup>RNAi</sup> embryos, showing only small  
275 spots of expression at the anterior rim (white arrow in Fig. 9D<sub>1</sub>). Later, the lateral expression  
276 developed normally while a median aspect of its expression was lost (white arrows in Fig. 9D<sub>2-4</sub>). *Tc-rx*  
277 expression at early elongating germ band stages was absent after *Tc-foxQ2*<sup>RNAi</sup> (Fig. 9F<sub>1</sub>). This was

278 unexpected because *Tc-rx* is largely expressed outside the *Tc-foxQ2* expression domain (Fig. 6A<sub>0-2</sub>)  
279 arguing against a direct effect. Indeed, our misexpression studies indicate a repressive role (see  
280 below). At later stages, the lateral aspects of *Tc-rx* expression recovered but the labral expression  
281 domain was reduced or lost, in line with co-expression (empty arrowheads in Fig. 9F<sub>2-3</sub>).

282 Next, we scored *Tc-foxQ2* expression in *Tc-chx*<sup>RNAi</sup>, *Tc-six4*<sup>RNAi</sup> and *Tc-rx*<sup>RNAi</sup> embryos. In neither  
283 treatment the early aspects of *Tc-foxQ2* expression were affected while at later stages, we found  
284 expression differences within the neurogenic region (Fig. S10). These results confirm the upstream  
285 role of *Tc-foxQ2* in early anterior patterning and they confirm that the interactions of the aGRN at  
286 later stages differ from the early ones. We found no change of cell death in the neurogenic region of  
287 *Tc-foxQ2*<sup>RNAi</sup> embryos until retraction, where cell death was significantly increased 1.5 fold ( $p=0.023$ ).  
288 Hence, the observed changes in expression domains are likely due to regulatory interactions but not  
289 due to loss of tissue (Fig. S11).

## 290 *Tc-foxQ2* gain-of-function analysis confirms function in anterior median 291 neuroectoderm

292 Heat shock-mediated misexpression has been established in *Tribolium* (Schinko et al., 2012) but has  
293 not yet been applied to the study of gene function. From eight independent transgenic lines we  
294 selected one for our experiments, which showed the most evenly distributed misexpression upon  
295 heat shock (Fig. S12). Heat shock misexpression led to a reproducible pleiotropic cuticle phenotype.  
296 With respect to the anterior head the bristle pattern showed diverse signs of mild disruption (Fig.  
297 S13). Outside its expression domain, *Tc-foxQ2* misexpression led to a reduced number of segments in  
298 the legs, the abdomen and the terminus. For our experiments, we used the earliest possible time  
299 point of misexpression (at 9-13 h AEL), which led to higher portion of anterior defects compared to  
300 14-20 h AEL and 20-25 h AEL (not shown). At 14-18 h AEL the heat-shocked embryos were fixed and

301 marker gene expression was scored. Wt embryos undergoing the same procedure were used as  
302 negative control.

303 Strongest effects were found with respect to genes with comparable late onset of expression, i.e. *Tc-*  
304 *rx*, *Tc-six4*, *Tc-scro/nk2.1* and *Tc-cnc* (Fig. 10). The *Tc-rx* expression was reduced to a spotty pattern  
305 (Fig. 10A-C). This repressive function of *Tc-foxQ2* on *Tc-rx* is in line with the non-overlapping adjacent  
306 expression of these two genes (Fig. 6A<sub>0-2</sub>). Therefore, we assume that the reduction of *Tc-rx* found in  
307 RNAi is due to secondary effects rather (see above). Ectopic *Tc-foxQ2* expression caused a premature  
308 onset and an expansion of *Tc-six4* expression (Fig. 10E,F) and an additional ectopic domain was found  
309 in the posterior head (white arrowhead in Fig. 10E,F). *Tc-scro/nk2.1* expression emerged precociously  
310 and was expanded in size (Fig. 10H,I). Later, the domain was altered in shape and had a spotted  
311 appearance. In case of *Tc-cnc*, a posterior expansion of the expression was observed (empty  
312 arrowhead in Fig. 10N,O).

313

314 Heat shock-induced expression starts only at late blastoderm stages (Schinko et al., 2012). Therefore,  
315 we were not able to test for the early interactions of the aGRN. Hence, comparably mild alterations  
316 of expression were found for *Tc-wg*, *Tc-six3* and *Tc-croc* after ectopic *Tc-foxQ2* expression (Fig. S14)  
317 in germ rudiments.

318

319

320

## 321 Discussion

### 322 Dynamic *six3/foxQ2* interactions govern anterior development

323 With this work we present the first functional analysis of *Tc-foxQ2* in any protostome and together  
324 with previous work we present the most comprehensive aGRN within protostomes (Fig. 11). We  
325 found that *Tc-foxQ2* is required at the top of the gene regulatory network to pattern the anterior-  
326 most part of the beetle embryo.

327

328 Interestingly, we identified a positive regulatory loop between *Tc-six3* and *Tc-foxQ2* at early  
329 embryonic stages (germ rudiment) forming a novel regulatory module. In support of this, the  
330 epidermal and neural phenotypes of these genes are very similar as well as several genetic  
331 interactions (Posnien et al., 2011b). The *six3/foxQ2* regulatory module regulates a large number of  
332 genes that are required for anterior AMR patterning (e.g. anterior *Tc-cnc* and *Tc-croc* expression) and  
333 neuroectoderm patterning (e.g. *Tc-chx*). Hence, it lies at the top of the aGRN governing insect head  
334 and brain development. Such a self-regulatory module at the top of a gene network is not without  
335 precedence: For instance, *eyes absent*, *eyeless*, *dachshund*, and *sine oculis* form a positive regulatory  
336 loop at the top of the *Drosophila* eye gene regulatory network and as consequence all four genes are  
337 required for eye development leading to similar mutant phenotypes (i.e. complete loss of the eyes)  
338 (Wagner, 2007). With our data we are not able to distinguish between alternative modes of  
339 interactions: Both genes could cooperate in the regulation of the same targets, they could  
340 individually regulate different subsets, or one gene could be the regulator of all target genes while  
341 the other would just be required for initiation of expression.

342 Within the regulatory module, *Tc-six3* appears to be primus inter pares based on a number of  
343 criteria: Its expression starts a bit earlier (at the differentiated blastoderm stage compared to the

344 germ rudiment expression of *Tc-foxQ2*) and has a larger expression domain, in which early *Tc-foxQ2*  
345 is completely nested. Further, the loss of *Tc-foxQ2* in *Tc-six3* RNAi is more complete even at later  
346 stages compared to the converse experiment (Fig. 7). Finally, the *Tc-six3* cuticle phenotype is more  
347 penetrant and comprises a slightly larger region of the dorsal head (compare with Posnien et al.  
348 2011b).

349 Interestingly, the mutual activation of the *six3/foxQ2* module does not persist as the initially  
350 overlapping expression patterns diverge to become largely non-overlapping at later embryonic  
351 stages (Fig. 5B<sub>2-6</sub>). Just small domains in the neuroectoderm and the labrum continue to co-express  
352 both genes (encircled in Fig. 5B<sub>3-6</sub>). Given the almost mutually exclusive expression they might even  
353 switch to mutual repression at these later stages. In line with this scenario the heat shock  
354 misexpression of *Tc-foxQ2* led to a reduction of lateral aspects of *Tc-six3* expression (Fig. S14). Hence,  
355 it could be that later repression of *six3* by *foxQ2* is conserved between sea urchin and beetles.

356

## 357 Protostome *foxQ2* evolved novel functions in head and brain development

358 Functional studies of *foxQ2* orthologs were restricted to a sea urchin as model for deuterostomes  
359 and the sea anemone, a cnidarian, representing the sister group to the bilaterian animals. We  
360 provide the first functional study in protostomes, which allows us drawing first conclusions on the  
361 evolution of *foxQ2* function. Compared to sea urchin and sea anemone, *Tc-foxQ2* plays a much more  
362 important role in our protostome model. First, it is clearly required for epidermal development  
363 documented in the loss of the entire labrum in knockdown animals. This is in contrast to sea urchin  
364 and sea anemone where no epidermal phenotype was described apart from a thickened animal plate  
365 (Sinigaglia et al., 2013; Yaguchi et al., 2008). Second, *Tc-foxQ2* is required for the development of two  
366 brain parts required for higher order processing, namely the CX and the MBs. Again, the neural



367 phenotype in the other models was much weaker in that it affected the specification of certain cell  
368 types rather than the loss of tissues or brain parts (Sinigaglia et al., 2013; Yaguchi et al., 2008;  
369 Yaguchi et al., 2010). Finally, *Tc-foxQ2* is required for *Tc-six3* expression in *Tribolium*, which is not the  
370 case in the other models (Range and Wei, 2016; Sinigaglia et al., 2013; Yaguchi et al., 2008). Much of  
371 these novel functions may be explained by *Tc-foxQ2* gaining control over *Tc-six3* expression in our  
372 protostome model system.

### 373 The evolutionary scenario: *foxQ2* gaining functions in animal evolution

374 Based on previous expression data, it has been suggested that *foxQ2* orthologs played a role in  
375 anterior development in all animals and that this involved interaction with *six3* orthologs (Fig. 12)  
376 (Fritzenwanker et al., 2014; Hunnekühl and Akam, 2014; Marlow et al., 2014; Martín-Durán et al.,  
377 2015; Santagata et al., 2012; Sinigaglia et al., 2013; Tu et al., 2006; Wei et al., 2009). In line with a  
378 conserved function, at early stages, *foxQ2* shows co-expression with *six3* in deuterostomes and  
379 cnidarians and a nested expression within protostomes. In all cases, *foxQ2* arises within the *six3*  
380 domain (Fig. 12 left column). At later stages, in contrast, expression is more diverse. Some species  
381 retain nested or co-expression with *six3* while other species develop *six3* negative/*foxQ2* positive  
382 domains similar to what we found in the beetle. In other species, the anterior-most region is cleared  
383 from expression of both genes (Fig. 12 right column). This variation is not clearly linked to certain  
384 clades indicating that the regulatory interactions at later stages may have evolved independently. In  
385 addition to the novel functions described above, there are conserved functional aspects as well:  
386 Initial activation of *foxQ2* by *six3* is found in all three functional model species. Repression of *six3* by  
387 *foxQ2* was found in *Strongylocentrotus* and *Tribolium* (at later stages) but not *Nematostella* (Range  
388 and Wei, 2016; Sinigaglia et al., 2013).

389 Together, these data indicate that at the base of metazoans *foxQ2* and *six3* were involved in early  
390 anterior patterning with *six3* being upstream of *foxQ2*. The anterior expression of both genes

391 depended on repression by posterior Wnt signaling (Darras et al., 2011; Fritzenwanker et al., 2014;  
392 Marlow et al., 2014; Range and Wei, 2016; Sinigaglia et al., 2013; Wei et al., 2009; Yaguchi et al.,  
393 2008). After the split from Cnidaria, the Urbilateria *foxQ2* evolved a repressive function on *six3*  
394 leading to more complex expression and increased diversity of the molecular code specifying cells at  
395 the anterior pole (Range and Wei, 2016). This diversification may have been required for the  
396 evolution of more diverse neural cell types. In protostomes, *foxQ2* additionally evolved control over  
397 early *six3* expression. Indeed, the role of *six3* as primus inter pares in the regulatory module of  
398 *Tribolium* may be a remnant of the ancestrally more important role of *six3*. A curiosity is the loss of  
399 such a highly conserved gene in the genome of placental mammals while other vertebrates still  
400 have the gene (Mazet et al., 2003; Yu et al., 2008). Unfortunately, *foxQ2* function in vertebrates  
401 remains unstudied. Of course, conclusions on gene function evolution based on one taxon for  
402 deuterostomes and protostomes, respectively, require further testing by analyses in other species.  
403 Hence, it will be interesting to see what the function of *foxQ2* is in other models representing  
404 deuterostomes, Lophotrochozoa and Ecdysozoa.

405

406

## 407 Materials and Methods

### 408 Animals and ethical statement

409 All the presented work is based on animals of the insect species *Tribolium castaneum*. Hence, an  
410 ethical approval was not required.

411 Animals were reared under standard conditions at 32°C (Brown et al., 2009). The *San Bernadino (SB)*  
412 wild-type strain was used for all experiments except for initial reproduction of the phenotype, where

413 the *black* (Sokoloff, 1974) and the *Pig-19/pBA19* (Lorenzen et al., 2003) strains were used like in the  
414 iBeetle screen. The *Tc-vermillion<sup>white</sup>* (*v<sub>w</sub>*) strain (Lorenzen et al., 2002) was used for transgenesis and  
415 heat shock experiments. Transgenic lines marking parts of the brain (*MB-green* line (G11410); *brainy*  
416 line) were described in (Koniszewski et al., 2016).

## 417 Sequence and phylogenetic analysis

418 *Tc-foxQ2* full coding sequence (1633 bp; Gen bank accession number: XM\_008202469) was obtained  
419 from the *Tribolium* genome browser (<http://bioinf.uni-greifswald.de/gb2/gbrowse/tcas5/>) and the  
420 sequence was confirmed by cloning the full coding sequence from cDNA. Phylogenetic analysis was  
421 done by using MEGA v.5 (Tamura et al., 2011). The multiple sequence alignment was conducted with  
422 the ClustalW algorithm with the preset parameters. Positions containing gaps were eliminated from  
423 the dataset. The phylogenetic tree was constructed using the Neighbor-Joining method with the  
424 Dayhoff matrix based substitution model (Schwartz and Dayhoff, 1979). Bootstrap tests (Felsenstein,  
425 1985) were conducted using 1000 replicates to test the robustness of the phylogenetic tree.

## 426 RNAi

427 To test for RNAi efficiency, we detected *Tc-foxQ2* mRNA in *Tc-foxQ2* RNAi embryos (6-26 h AEL). As  
428 expected, no signal was detected using regular detection settings (not shown) but increasing the  
429 exposure time revealed residual *Tc-foxQ2* expression at advanced embryonic stages (Fig. S5; note the  
430 increased background in B,D,F,H). These domains reflected only part of the wt expression pattern  
431 indicating autoregulatory interactions restricted to some domains. Our subsequent analyses focused  
432 on early patterning where the RNAi knockdown was shown to be very efficient (Fig. S5A,B).

433

434 Template sequence of the dsRNA fragment *iB\_03837* (Eupheria Biotech, Dresden, Germany)  
435 targeting *Tc-foxQ2*, which was used in the iBeetle screen:

436 5'-CAGCACATCCTCGACCACTATCCTTACTTCAGGACCCGGGACCGGGTTGGAGAACTCCATCAGG  
437 CATAATTTGTCTCTCAATGATTGTTTCATCAAGGCGGGAAGAAGCGCCAACGGAAAGGGACATTACTG  
438 GGCAATTCATCCC GCAAATGTGGACGACTTTAGAAAAGGGGACTTCAGGAGGAGGAAGGCACAAAGAA  
439 AGGTGAGGAAGCACATGGGGCTTGCCGTCGATGAAGATGGGGCTGATTTCGCCAAGTCCGCCGCCCTTG  
440 TCTGTGAGTCCGCCTGTCGTGCCAGGGCCTTCCACGTCCGTTTATCACACAGTGCCGGCTCGAGGTCC  
441 GTCTCGCAAGCGGCAGTTCGACGTGGCGTCGCTTTTGGCGCCGGATTCCGGTGAAGACACCAACGAAG  
442 AGGACATCGACGTGCTCTCCAGTGACCAACACCAAGAGACTTCACCCAAACAGTGGCCTAATATGTTT  
443 CCCATCGTTAATTATTATCAAGCATTGTTACAAGCGA-3'.

444 The templates for the non-overlapping dsRNA fragments, used in this study, were generated by PCR  
445 from a plasmid template using following primers (including T7 RNA polymerase promoter sequence):  
446 Fragment *Tc-foxQ2*<sup>RNAi\_a</sup> (489 bp): 5'-GAATTGTAATACGACTCACTATAGGCTTACTTCAGGACCCGG-3' and  
447 5'-GAATTGTAATACGACTCACTATAGGTCGCTTGTAACAATGCTTGA-3'; Fragment *Tc-foxQ2*<sup>RNAi\_b</sup>,  
448 (197 bp): 5'-GAATTGTAATACGACTCACTATAGGATGTGCAGTAACGAGACTCC-3' and  
449 5'-GAATTGTAATACGACTCACTATAGGCTGGGGAAGAGCGGATAGC-3'. The dsRNA was synthesized  
450 using the Ambion® T7 MEGAscript® kit (lifeTechnologies, Carlsbad, CA, USA). The transcribed dsRNA  
451 was extracted via isopropanol precipitation (*Tc-foxQ2*<sup>RNAi\_a</sup>) or phenol/chloroform extraction (*Tc-*  
452 *foxQ2*<sup>RNAi\_b</sup>) and dissolved in injection buffer (1.4 mM NaCl, 0.07 mM Na<sub>2</sub>HPO<sub>4</sub>, 0.03 mM KH<sub>2</sub>PO<sub>4</sub>,  
453 4 mM KCl, pH 6.8). The injected dsRNA concentrations for parental RNAi with *Tc-foxQ2*<sup>RNAi\_a</sup> and *Tc-*  
454 *foxQ2*<sup>RNAi\_b</sup> were 1.0 µg/µl, 1.5 µg/µl and 3.1 µg/µl. If not stated differently, a dsRNA concentration of  
455 1.5 µg/µl was used. Pupal injections were performed as previously described (Bucher et al., 2002;  
456 Posnien et al., 2009b). The dsRNA was injected using FemtoJet® express (eppendorf, Hamburg,  
457 Germany). Cuticles of the L1 larval offspring were prepared as described (Wohlfrom et al., 2006).

## 458 Staining

459 Standard immunostaining was performed using the cleaved *Drosophila* Dcp-1 (Asp216) rabbit  
460 antibody (Cell Signaling Technology, Danvers, MA, USA; #9578) with 1:100 dilution. Anti-rabbit  
461 coupled with Alexa Fluor 488 was used for detection with 1:1000 dilution. ISH (alkaline  
462 phosphatase/NBT/BCIP) and DISH (alkaline phosphatase/NBT/BCIP & horseradish peroxidase  
463 mediated tyramide signal amplification (TSA) reaction) (Dylight550 conjugate synthesized by Georg  
464 Oberhofer) were performed as described previously (Oberhofer et al., 2014; Schinko et al., 2009;  
465 Siemanowski et al., 2015).

## 466 Quantification of apoptosis

467 The regions of interest were set based on head morphology. Cell counting was performed using the  
468 Fiji cell counter plug-in (Schindelin et al., 2012). The number of apoptotic cells was positively  
469 correlated with age. Hence, to circumvent systematic errors due to staging the apoptotic cell number  
470 in the posterior procephalon was used to normalize the data. This region was chosen, because it was  
471 outside the *foxQ2* expression domain and unaffected by our RNAi experiments. The correction value  
472 was calculated by dividing the mean number of apoptotic cells of RNAi embryos by the mean number  
473 of apoptotic cells in wt embryos in the control region. For the normalization, the data was divided by  
474 the correction value. Raw counts are shown in Table S7.

475 The normalized data was tested with R (v.2.14.2; <http://www.R-project.org/>) for the homogeneity of  
476 the variances via the box plot, and for normal distribution, via the Shapiro-Wilk test. To test for  
477 significance, three statistical tests were conducted: Welch t-test, two sample t-test and the Wilcoxon  
478 rank-sum test. All three tests showed the same levels of significance. Stated *p*-values are based on  
479 the Wilcoxon rank-sum test results.

## 480 Transgenesis and heat shock

481 The *foxQ2* heat shock construct was based on the constructs developed by Schinko et al., 2012 and  
482 germline transformation was performed as described previously (Berghammer et al., 1999; Schinko  
483 et al., 2012) using the injection buffer used for RNAi experiments and the mammalian codon-  
484 optimized hyperactive transposase (Yusa et al., 2011) flanked by the *Tc-hsp68* sequences (gift from  
485 Stefan Dippel). All animals for heat shock experiments were kept at 32°C. Heat shock was performed  
486 as described previously (Schinko et al., 2012) for ten minutes at 48°C (for cuticle preparations: 0-24 h  
487 AEL, 9-13 h AEL, 14-20 h AEL, 20-25 h AEL; for ISHs: 9-13 h AEL (fixated 5 h later)).

## 488 Image documentation and processing

489 Cuticle preparations and L1 larval brains were imaged as described (Posnien et al., 2011b; Wohlfrom  
490 et al., 2006) using the LSM510 or Axioplan 2 (ZEISS, Jena, Germany) and processed using Amira  
491 (v.5.3.2; FEI) using 'voltex' projections. Stacks were visualized as average or maximum projections  
492 using Fiji (v. 1.49i; (Schindelin et al., 2012)). All images were level-adjusted and assembled in  
493 Photoshop CS (Adobe) and labelled using Illustrator CS5 (Adobe).

494

495

496

## 497 Acknowledgements

498 We thank Claudia Hinnert for excellent technical help and Stefan Dippel for the hyperactive helper  
499 construct. The phenotype was initially identified in the iBeetle project (DFG research unit FOR1234)  
500 and the work was supported by DFG grants BU1443/11, BU1443/8 and the Göttingen Graduate  
501 School for Neurosciences, Biophysics, and Molecular Biosciences (GGNB).

502

503

## 504 References

- 505 **Benayoun, B. A., Caburet, S. and Veitia, R. A.** (2011). Forkhead transcription factors: key players in  
506 health and disease. *Trends Genet.* **27**, 224–232.
- 507 **Berghammer, A. J., Klingler, M. and Wimmer, E. A.** (1999). A universal marker for transgenic insects.  
508 *Nature* **402**, 370–371.
- 509 **Bolognesi, R., Fischer, T. D. and Brown, S. J.** (2009). Loss of Tc-arrow and canonical Wnt signaling  
510 alters posterior morphology and pair-rule gene expression in the short-germ insect,  
511 *Tribolium castaneum*. *Dev Genes Evol* **219**, 369–75.
- 512 **Boyan, G. S. and Reichert, H.** (2011). Mechanisms for complexity in the brain: generating the insect  
513 central complex. *Trends Neurosci.* **34**, 247–257.
- 514 **Brown, S., Fellers, J., Shippy, T., Denell, R., Stauber, M. and Schmidt-Ott, U.** (2001). A strategy for  
515 mapping bicoid on the phylogenetic tree. *Curr Biol* **11**, R43-4.

- 516 **Brown, S. J., Shippy, T. D., Miller, S., Bolognesi, R., Beeman, R. W., Lorenzen, M. D., Bucher, G.,**  
517 **Wimmer, E. A. and Klingler, M.** (2009). The Red Flour Beetle, *Tribolium castaneum*  
518 (Coleoptera): A Model for Studies of Development and Pest Biology. *Cold Spring Harb.*  
519 *Protoc.* **2009**, pdb.emo126-emo126.
- 520 **Bucher, G., Scholten, J. and Klingler, M.** (2002). Parental RNAi in *Tribolium* (Coleoptera). *Curr. Biol.*  
521 **12**, R85–R86.
- 522 **Coulcher, J. F. and Telford, M. J.** (2012). Cap'n'collar differentiates the mandible from the maxilla in  
523 the beetle *Tribolium castaneum*. *Evodevo* **3**, 25.
- 524 **Darras, S., Gerhart, J., Terasaki, M., Kirschner, M. and Lowe, C. J.** (2011). -Catenin specifies the  
525 endomesoderm and defines the posterior organizer of the hemichordate *Saccoglossus*  
526 *kowalevskii*. *Development* **138**, 959–970.
- 527 **Dönitz, J., Schmitt-Engel, C., Grossmann, D., Gerischer, L., Tech, M., Schoppmeier, M., Klingler, M.**  
528 **and Bucher, G.** (2015). iBeetle-Base: a database for RNAi phenotypes in the red flour beetle  
529 *Tribolium castaneum*. *Nucleic Acids Res.* **43**, D720–D725.
- 530 **Economou, A. D. and Telford, M. J.** (2009). Comparative gene expression in the heads of *Drosophila*  
531 *melanogaster* and *Tribolium castaneum* and the segmental affinity of the *Drosophila*  
532 hypopharyngeal lobes. *Evol Dev* **11**, 88–96.
- 533 **Felsenstein, J.** (1985). Confidence Limits on Phylogenies: An Approach Using the Bootstrap. *Evolution*  
534 **39**, 783.
- 535 **Florentin, A. and Arama, E.** (2012). Caspase levels and execution efficiencies determine the  
536 apoptotic potential of the cell. *J. Cell Biol.* **196**, 513–527.



- 537 **Fritzenwanker, J. H., Gerhart, J., Freeman, R. M. and Lowe, C. J.** (2014). The Fox/Forkhead  
538 transcription factor family of the hemichordate *Saccoglossus kowalevskii*. *EvoDevo* **5**, 17.
- 539 **Fu, J., Posnien, N., Bolognesi, R., Fischer, T. D., Rayl, P., Oberhofer, G., Kitzmann, P., Brown, S. J.**  
540 **and Bucher, G.** (2012). Asymmetrically expressed axin required for anterior development in  
541 *Tribolium*. *Proc. Natl. Acad. Sci. U. S. A.* **109**, 7782–7786.
- 542 **Heisenberg, M.** (2003). Mushroom body memoir: from maps to models. *Nat. Rev. Neurosci.* **4**, 266–  
543 275.
- 544 **Hunnekuhl, V. S. and Akam, M.** (2014). An anterior medial cell population with an apical-organ-like  
545 transcriptional profile that pioneers the central nervous system in the centipede *Strigamia*  
546 *maritima*. *Dev. Biol.* **396**, 136–149.
- 547 **Kittelman, S., Ulrich, J., Posnien, N. and Bucher, G.** (2013). Changes in anterior head patterning  
548 underlie the evolution of long germ embryogenesis. *Dev. Biol.* **374**, 174–184.
- 549 **Kitzmann, P., Schwirz, J., Schmitt-Engel, C. and Bucher, G.** (2013). RNAi phenotypes are influenced  
550 by the genetic background of the injected strain. *BMC Genomics* **14**, 5.
- 551 **Koniszewski, N. D. B., Kollmann, M., Bigham, M., Farnworth, M., He, B., Büscher, M., Hütteroth,**  
552 **W., Binzer, M., Schachtner, J. and Bucher, G.** (2016). The insect central complex as model for  
553 heterochronic brain development—background, concepts, and tools. *Dev. Genes Evol.*
- 554 **Lee, H.-H. and Frasch, M.** (2004). Survey of forkhead domain encoding genes in the *Drosophila*  
555 genome: Classification and embryonic expression patterns. *Dev. Dyn.* **229**, 357–366.
- 556 **Lorenzen, M. D., Brown, S. J., Denell, R. E. and Beeman, R. W.** (2002). Cloning and characterization  
557 of the *Tribolium castaneum* eye-color genes encoding tryptophan oxygenase and kynurenine  
558 3-monooxygenase. *Genetics* **160**, 225–234.

- 559 **Lorenzen, M. D., Berghammer, A. J., Brown, S. J., Denell, R. E., Klingler, M. and Beeman, R. W.**  
560 (2003). piggyBac-mediated germline transformation in the beetle *Tribolium castaneum*.  
561 *Insect Mol. Biol.* **12**, 433–440.
- 562 **Lowe, C. J., Wu, M., Salic, A., Evans, L., Lander, E., Stange-Thomann, N., Gruber, C. E., Gerhart, J.**  
563 **and Kirschner, M.** (2003). Anteroposterior patterning in hemichordates and the origins of the  
564 chordate nervous system. *Cell* **113**, 853–65.
- 565 **Marlow, H., Matus, D. Q. and Martindale, M. Q.** (2013). Ectopic activation of the canonical wnt  
566 signaling pathway affects ectodermal patterning along the primary axis during larval  
567 development in the anthozoan *Nematostella vectensis*. *Dev. Biol.* **380**, 324–334.
- 568 **Marlow, H., Tosches, M. A., Tomer, R., Steinmetz, P. R., Lauri, A., Larsson, T. and Arendt, D.** (2014).  
569 Larval body patterning and apical organs are conserved in animal evolution. *BMC Biol.* **12**, 7.
- 570 **Martin, B. L. and Kimelman, D.** (2009). Wnt signaling and the evolution of embryonic posterior  
571 development. *Curr Biol* **19**, R215-9.
- 572 **Martín-Durán, J. M., Vellutini, B. C. and Hejnal, A.** (2015). Evolution and development of the  
573 adelphophagic, intracapsular Schmidt's larva of the nemertean *Lineus ruber*. *EvoDevo* **6**,.
- 574 **Mazet, F., Yu, J.-K., Liberles, D. A., Holland, L. Z. and Shimeld, S. M.** (2003). Phylogenetic  
575 relationships of the Fox (Forkhead) gene family in the Bilateria. *Gene* **316**, 79–89.
- 576 **Momose, T., Derelle, R. and Houlston, E.** (2008). A maternally localised Wnt ligand required for axial  
577 patterning in the cnidarian *Clytia hemisphaerica*. *Development* **135**, 2105–2113.
- 578 **Oberhofer, G., Grossmann, D., Siemanowski, J. L., Beissbarth, T. and Bucher, G.** (2014). Wnt/ -  
579 catenin signaling integrates patterning and metabolism of the insect growth zone.  
580 *Development* **141**, 4740–4750.

- 581 **Petersen, C. P. and Reddien, P. W.** (2009). Wnt signaling and the polarity of the primary body axis.  
582 *Cell* **139**, 1056–1068.
- 583 **Pfeiffer, K. and Homberg, U.** (2014). Organization and Functional Roles of the Central Complex in the  
584 Insect Brain. *Annu. Rev. Entomol.* **59**, 165–184.
- 585 **Posnien, N., Bashasab, F. and Bucher, G.** (2009a). The insect upper lip (labrum) is a nonsegmental  
586 appendage-like structure. *Evol Dev* **11**, 479–487.
- 587 **Posnien, N., Schinko, J., Grossmann, D., Shippy, T. D., Konopova, B. and Bucher, G.** (2009b). RNAi in  
588 the Red Flour Beetle (*Tribolium*). *Cold Spring Harb. Protoc.* **2009**, pdb.prot5256-prot5256.
- 589 **Posnien, N., Schinko, J. B., Kittelmann, S. and Bucher, G.** (2010). Genetics, development and  
590 composition of the insect head - A beetle's view. *Arthropod Struct Dev* **39**, 399–410.
- 591 **Posnien, N., Koniszewski, N. and Bucher, G.** (2011a). Insect Tc-six4 marks a unit with similarity to  
592 vertebrate placodes. *Dev Biol* **350**, 208–216.
- 593 **Posnien, N., Koniszewski, N. D. B., Hein, H. J. and Bucher, G.** (2011b). Candidate Gene Screen in the  
594 Red Flour Beetle *Tribolium* Reveals Six3 as Ancient Regulator of Anterior Median Head and  
595 Central Complex Development. *PLoS Genet.* **7**, e1002418.
- 596 **Range, R. C. and Wei, Z.** (2016). An anterior signaling center patterns and sizes the anterior  
597 neuroectoderm of the sea urchin embryo. *Development*.
- 598 **Santagata, S., Resh, C., Hejnol, A., Martindale, M. Q. and Passamanek, Y. J.** (2012). Development of  
599 the larval anterior neurogenic domains of *Terebratalia transversa* (Brachiopoda) provides  
600 insights into the diversification of larval apical organs and the spiralian nervous system.  
601 *EvoDevo* **3**, 3.

- 602 **Schaeper, N. D., Pechmann, M., Damen, W. G., Prpic, N. M. and Wimmer, E. A.** (2010). Evolutionary  
603 plasticity of collier function in head development of diverse arthropods. *Dev Biol* **344**, 363–  
604 76.
- 605 **Schindelin, J., Arganda-Carreras, I., Frise, E., Kaynig, V., Longair, M., Pietzsch, T., Preibisch, S.,**  
606 **Rueden, C., Saalfeld, S., Schmid, B., et al.** (2012). Fiji: an open-source platform for biological-  
607 image analysis. *Nat. Methods* **9**, 676–682.
- 608 **Schinko, J., Posnien, N., Kittelmann, S., Koniszewski, N. and Bucher, G.** (2009). Single and Double  
609 Whole-Mount In Situ Hybridization in Red Flour Beetle (*Tribolium*) Embryos. *Cold Spring*  
610 *Harb. Protoc.* **2009**, pdb.prot5258-prot5258.
- 611 **Schinko, J. B., Hillebrand, K. and Bucher, G.** (2012). Heat shock-mediated misexpression of genes in  
612 the beetle *Tribolium castaneum*. *Dev. Genes Evol.* **222**, 287–298.
- 613 **Schmitt-Engel, C., Schultheis, D., Schwirz, J., Ströhlein, N., Troelenberg, N., Majumdar, U., Dao, V.**  
614 **A., Grossmann, D., Richter, T., Tech, M., et al.** (2015). The iBeetle large-scale RNAi screen  
615 reveals gene functions for insect development and physiology. *Nat. Commun.* **6**, 7822.
- 616 **Schoppmeier, M. and Schröder, R.** (2005). Maternal torso signaling controls body axis elongation in a  
617 short germ insect. *Curr Biol* **15**, 2131–6.
- 618 **Schwartz, R. M. and Dayhoff, M. O.** (1979). Protein and nucleic Acid sequence data and phylogeny.  
619 *Science* **205**, 1038–1039.
- 620 **Siemanowski, J., Richter, T., Dao, V. A. and Bucher, G.** (2015). Notch signaling induces cell  
621 proliferation in the labrum in a regulatory network different from the thoracic legs. *Dev. Biol.*  
622 **408**, 164–177.

- 623 **Sinigaglia, C., Busengdal, H., Leclère, L., Technau, U. and Rentzsch, F.** (2013). The Bilaterian Head  
624 Patterning Gene six3/6 Controls Aboral Domain Development in a Cnidarian. *PLoS Biol.* **11**,  
625 e1001488.
- 626 **Sokoloff, A.** (1974). *The biology of Tribolium, with special emphasis on genetic aspects.*
- 627 **Stauber, M., Jackle, H. and Schmidt-Ott, U.** (1999). The anterior determinant bicoid of *Drosophila* is  
628 a derived Hox class 3 gene. *Proc Natl Acad Sci U S A* **96**, 3786–9.
- 629 **Steinmetz, P. R., Urbach, R., Posnien, N., Eriksson, J., Kostyuchenko, R. P., Brena, C., Guy, K., Akam,**  
630 **M., Bucher, G. and Arendt, D.** (2010). Six3 demarcates the anterior-most developing brain  
631 region in bilaterian animals. *EvoDevo* **1**, 14.
- 632 **Tamura, K., Peterson, D., Peterson, N., Stecher, G., Nei, M. and Kumar, S.** (2011). MEGA5: Molecular  
633 Evolutionary Genetics Analysis Using Maximum Likelihood, Evolutionary Distance, and  
634 Maximum Parsimony Methods. *Mol. Biol. Evol.* **28**, 2731–2739.
- 635 **Telford, M. J., Bourlat, S. J., Economou, A., Papillon, D. and Rota-Stabelli, O.** (2008). The evolution  
636 of the Ecdysozoa. *Philos Trans R Soc Lond B Biol Sci* **363**, 1529–37.
- 637 **Tu, Q., Brown, C. T., Davidson, E. H. and Oliveri, P.** (2006). Sea urchin Forkhead gene family:  
638 Phylogeny and embryonic expression. *Dev. Biol.* **300**, 49–62.
- 639 **Wagner, G. P.** (2007). The developmental genetics of homology. *Nat. Rev. Genet.* **8**, 473–479.
- 640 **Wei, Z., Yaguchi, J., Yaguchi, S., Angerer, R. C. and Angerer, L. M.** (2009). The sea urchin animal pole  
641 domain is a Six3-dependent neurogenic patterning center. *Development* **136**, 1583–1583.
- 642 **Wohlfrom, H., Schinko, J. B., Klingler, M. and Bucher, G.** (2006). Maintenance of segment and  
643 appendage primordia by the *Tribolium* gene knödel. *Mech. Dev.* **123**, 430–439.

- 644 **Yaguchi, S., Yaguchi, J., Angerer, R. C. and Angerer, L. M.** (2008). A Wnt-FoxQ2-Nodal Pathway Links  
645 Primary and Secondary Axis Specification in Sea Urchin Embryos. *Dev. Cell* **14**, 97–107.
- 646 **Yaguchi, S., Yaguchi, J., Wei, Z., Shiba, K., Angerer, L. M. and Inaba, K.** (2010). ankAT-1 is a novel  
647 gene mediating the apical tuft formation in the sea urchin embryo. *Dev. Biol.* **348**, 67–75.
- 648 **Yaguchi, J., Angerer, L. M., Inaba, K. and Yaguchi, S.** (2012). Zinc finger homeobox is required for the  
649 differentiation of serotonergic neurons in the sea urchin embryo. *Dev. Biol.* **363**, 74–83.
- 650 **Yaguchi, J., Takeda, N., Inaba, K. and Yaguchi, S.** (2016). Cooperative Wnt-Nodal Signals Regulate the  
651 Patterning of Anterior Neuroectoderm. *PLoS Genet.* **12**, e1006001.
- 652 **Yu, J.-K., Mazet, F., Chen, Y.-T., Huang, S.-W., Jung, K.-C. and Shimeld, S. M.** (2008). The Fox genes  
653 of *Branchiostoma floridae*. *Dev. Genes Evol.* **218**, 629–638.
- 654 **Yusa, K., Zhou, L., Li, M. A., Bradley, A. and Craig, N. L.** (2011). A hyperactive piggyBac transposase  
655 for mammalian applications. *Proc. Natl. Acad. Sci.* **108**, 1531–1536.
- 656
- 657

## 658 List of Symbols and Abbreviations

659

660 AEL - after egg laying

661 aGRN - anterior gene regulatory network

662 AMR - anterior median region

663 *arr* - arrow

664 CB - central body

665 *cnc* - cap'n'collar

666 *col* - collier

667 *croc* - crocodile

668 CX - central complex

669 Dcp1 - cleaved *Drosophila* death caspase-1

670 *fkh* - forkhead

671 *foxa* - forkhead box a

672 *foxq2* - forkhead box q2

673 MB - mushroom body

674 *mib1* - mindbomb 1

675 *nk2.1* - *nk2 homeobox 1* (*thyroid transcription factor1*)

676 *rx* - retinal homeobox

677 *scro* - scarecrow

678 *ser* - serrate

679 *six3* - *sine oculis homeobox homolog 3*

680 *six4* - *sine oculis homeobox homolog 4*

681 *tll - tailless*

682 TSA - tyramide signal amplification

683 *wg - wingless*

684 *wnt1 - int1 (wingless-related1)*

685

## 686 Supporting Information Captions

687

688

689 Supplementary Figures

690 Given are 14 supplementary figures including legends supporting the data shown in the manuscript.

691 Supplementary Tables

692 Listed are raw counts of the quantification of apoptosis and the numbers visualized in the charts of

693 Figures 1 and 2 and Fig. S2.

694



695 **Figure legends**

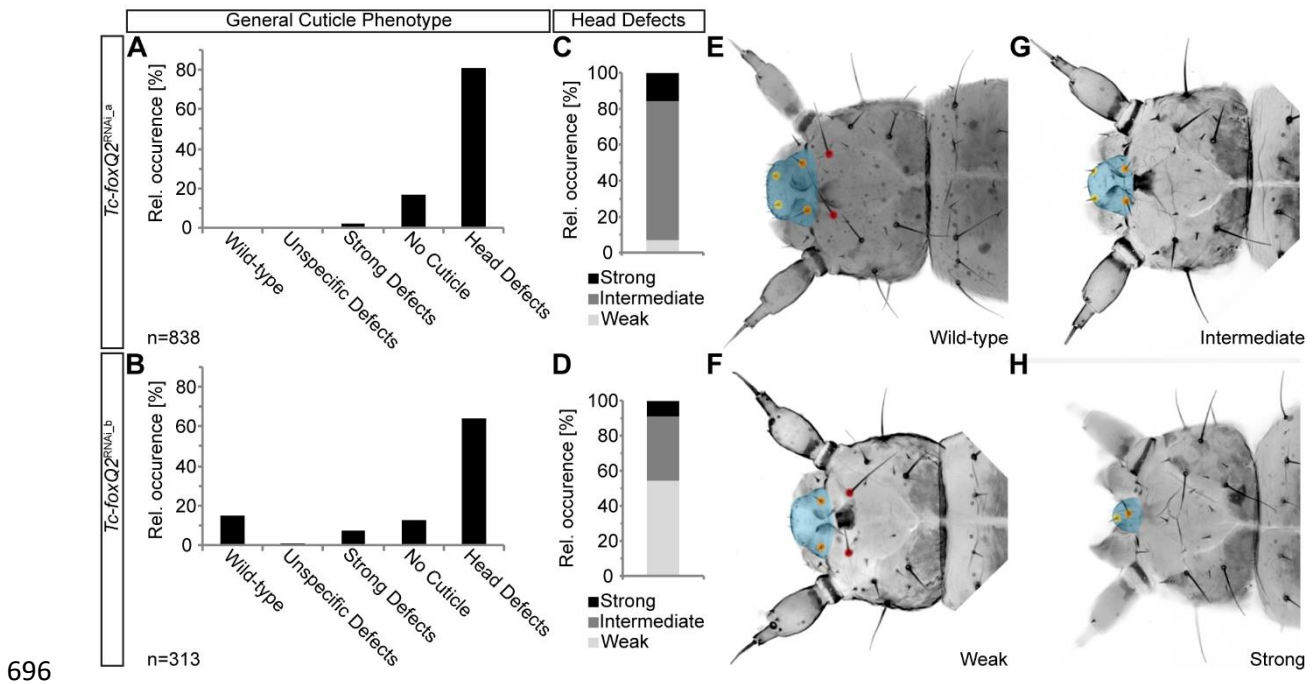

697 **Fig. 1. Quantitative analysis of the *Tc-foxQ2<sup>RNAi</sup>* epidermal L1 defects confirms the phenotype and**  
 698 **excludes off-target effects. (A, B)** Knockdown of *Tc-foxQ2* with two non-overlapping dsRNA  
 699 fragments *Tc-foxQ2<sup>RNAi\_a</sup>* (A) and *Tc-foxQ2<sup>RNAi\_b</sup>* (B) leads to comparable portions of cuticle  
 700 phenotypes. (C, D) Detailed analysis of the head defects shows that the *Tc-foxQ2<sup>RNAi\_a</sup>* dsRNA  
 701 fragment leads to a qualitatively comparable but quantitatively stronger phenotype, marked by more  
 702 intermediate (G) and strong (H) head defects. (E-H) L1 cuticle heads, depicted in a dorsal view, are  
 703 representing the different classes of head defects. Anterior is left. (E) Wt cuticle with the labrum  
 704 marked in blue, two labrum setae (yellow dots), two clypeus setae (orange dots) and two anterior  
 705 vertex setae (red dots). (F) Weak head defect with a reduced labrum and at least one deleted labrum  
 706 seta. (G) Intermediate head defect is additionally lacking at least one of the anterior vertex seta. (H)  
 707 Strong head defect with a strongly reduced labrum, one labrum seta and one clypeus seta. The  
 708 strongest phenotypes show a completely absent labrum and deleted anterior vertex setae.

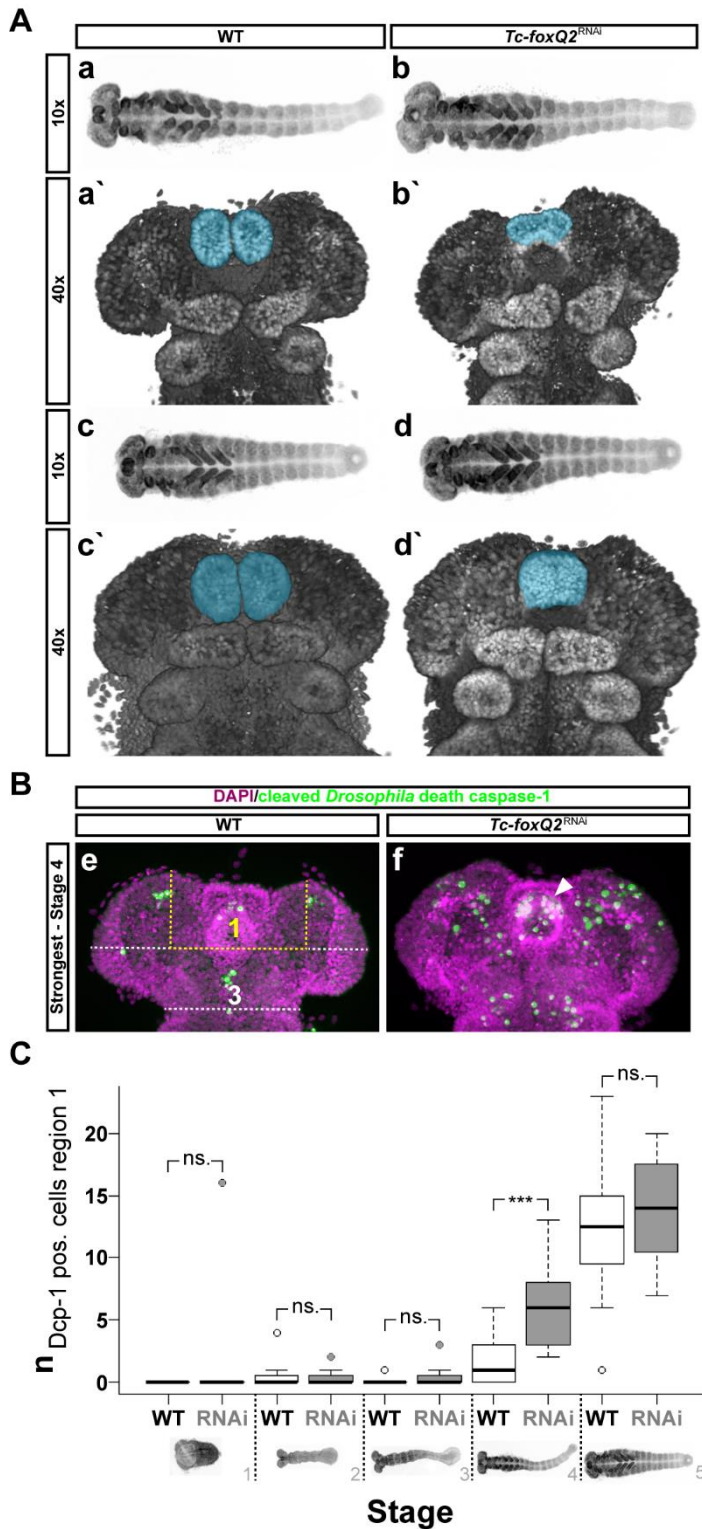

709

710 **Fig. 2. Emergence of the *Tc-foxQ2*<sup>RNAi</sup> phenotype and cell death rates.** (A) Morphology of wt (A<sub>a</sub>, A<sub>a'</sub>,  
 711 A<sub>c</sub>, A<sub>c'</sub>) and *Tc-foxQ2*<sup>RNAi</sup> (A<sub>b</sub>, A<sub>b'</sub>, A<sub>d</sub>, A<sub>d'</sub>) embryos is visualized by nuclear staining (DAPI, grey).  
 712 Anterior is left in 10x panels (A<sub>a-d</sub>) and up in 40x panels (A<sub>a'</sub>). The labrum is marked in blue (A<sub>a'</sub>-d'). (A<sub>a'</sub>-  
 713 d') *Tc-foxQ2*<sup>RNAi</sup> embryos (6-26 h AEL) show decreased labral buds, which appear to fuse prematurely

714 ( $A_b$ ,  $A_d$ ). (B) For quantification of cell death rates, a region of interest (ROI) and a control region were  
715 defined. The region of interest is the labral region (region 1, yellow dashed lines). The posterior  
716 procephalic region was used for data normalization (region 3, white dashed lines). Morphology of wt  
717 ( $B_e$ ) and  $Tc-foxQ2^{RNAi}$  ( $B_f$ ) embryos is visualized by nuclear staining (DAPI, magenta). Apoptotic cells  
718 are monitored by antibody staining (cleaved *Drosophila* death caspase-1 (Dcp-1) - Alexa Fluor 488;  
719 green). ( $B_e$ ,  $B_f$ ) The fully elongated  $Tc-foxQ2^{RNAi}$  germ band with the most apoptotic cells within the  
720 labral region (ROI 1, marked with dashed lines) showed apparently more marked cells ( $B_f$ ) than the  
721 strongest representative of the wt embryos within this stage and region ( $B_e$ ). ( $B_f$ ) The  $Tc-foxQ2^{RNAi}$   
722 embryo showed an accumulation of apoptotic cells within the labral buds (arrowhead). (C) Box plot  
723 depicting the normalized number of apoptotic cells (y-axis) versus five different embryonic stages,  
724 subdivided in untreated (wt) and  $Tc-foxQ2^{RNAi}$  embryos (x-axis). The ROI 1 values are normalized with  
725 the region 3 values ( $B_e$ ). Brackets display grade of significance. Germ rudiments (stage 1) to  
726 intermediate elongating germ bands (stage 3), as well as early retracting germ bands (stage 5) show  
727 no significant increase in the number of apoptotic cells within the ROI 1 of  $Tc-foxQ2^{RNAi}$  embryos  
728 (stage 1:  $p=0.33$  (wt:  $n=3$ , RNAi:  $n=7$ ), stage 2:  $p=0.63$  (wt:  $n=11$ , RNAi:  $n=12$ ), stage 3:  $p=0.19$  (wt:  
729  $n=9$ , RNAi:  $n=19$ ), stage 5:  $p=0.15$  (wt:  $n=12$ , RNAi:  $n=11$ )). However, fully elongated germ bands  
730 showed significantly more apoptotic cells ( $p=0.00041$ ) in  $Tc-foxQ2^{RNAi}$  embryos ( $n=15$ ) compared to  
731 untreated ones ( $n=17$ ). ns.: not significant

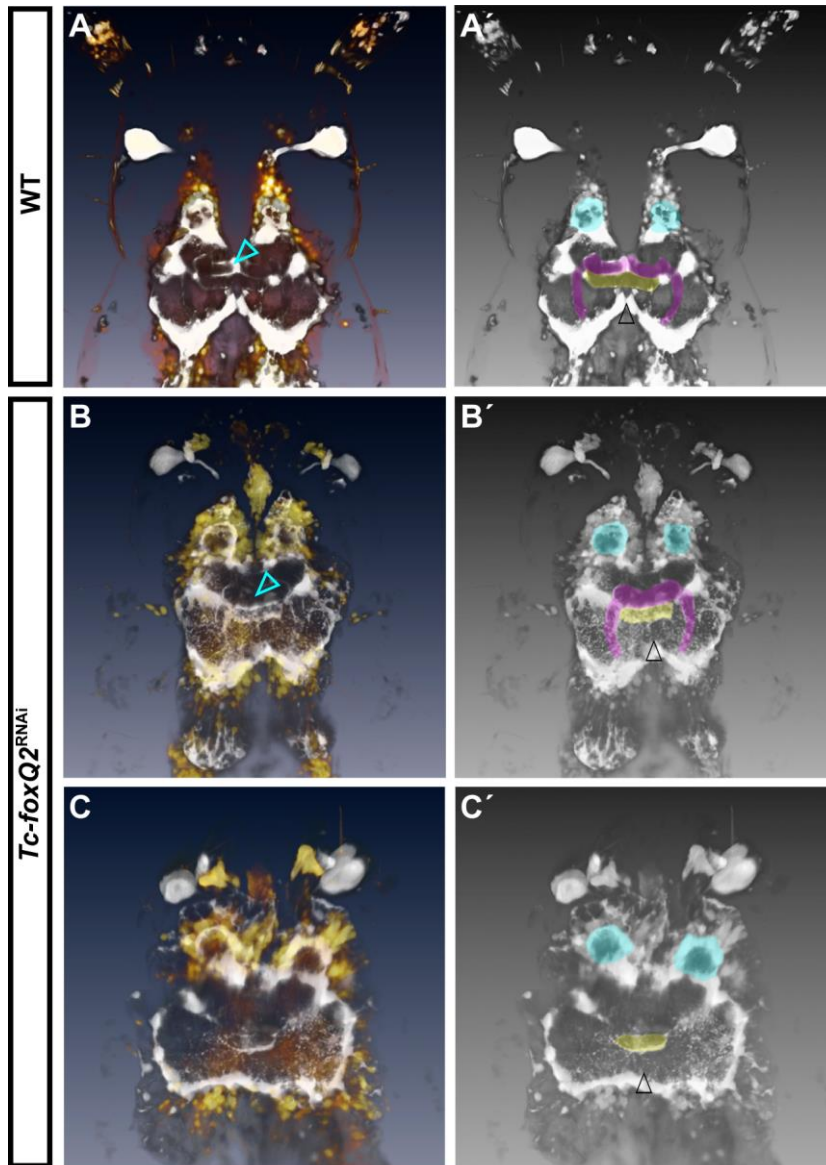

732

733 **Fig. 3. Embryonic loss of *Tc-foxQ2* function leads to defects in L1 larval brains.** Anterior is up. Neural  
734 cells (yellow) and glial tissue (white) are, in wt (**A, A'**) and *Tc-foxQ2*<sup>RNAi</sup> (**B-D'**) L1 larvae visualized by  
735 using the double transgenic *brainy* reporter line. The grey-scale images are for a better visualization  
736 of the regions of interest. (**A, A'**) Wt L1 larval brain that shows the two brain hemispheres, each with  
737 a mushroom body (magenta), an antennal lobe (cyan), and the mid-line spanning central body  
738 (yellow). (**B, B'**) A weak *Tc-foxQ2*<sup>RNAi</sup> larval brain phenotype showing the loss of the boundary  
739 between the medial lobes of the mushroom bodies (compare cyan arrowheads in **B** and **A**). The  
740 central body appears to be slightly reduced in size. (**C, C'**) Intermediate *Tc-foxQ2*<sup>RNAi</sup> larval brains  
741 appear to lack the complete mushroom bodies. The central body appears to be reduced in size.

742

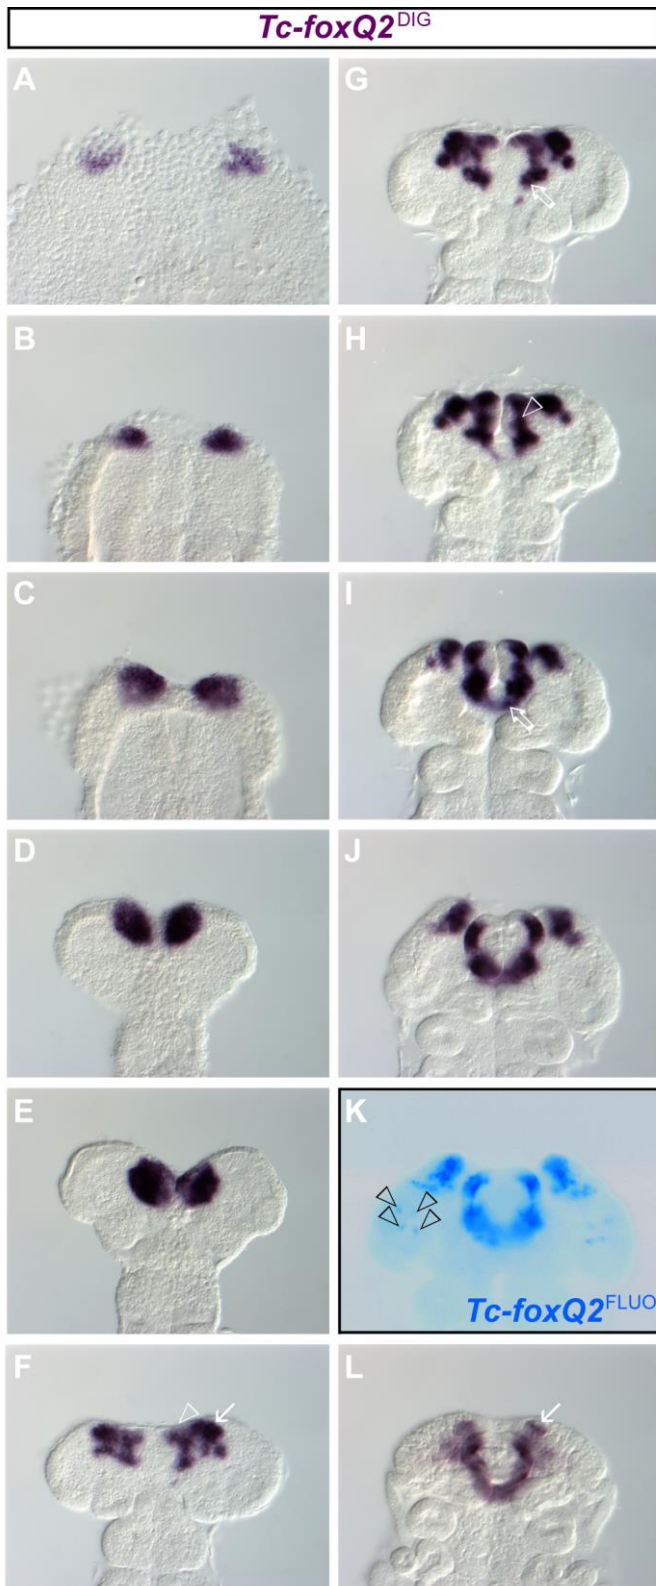

743

744 **Fig. 4. *Tc-foxQ2* is expressed in a highly dynamic pattern at the anterior pole.** Anterior is up.  
745 Expression of *Tc-foxQ2* in wild-type (wt) embryos is monitored by whole mount in situ hybridization  
746 (ISH). (A) *Tc-foxQ2* expression starts with the formation of the germ rudiment. (A-E) The early *Tc-*

747 *foxQ2* expression is marked by two domains located at the anterior pole, which successively  
748 approach each other, probably due to morphogenetic movements, at the embryonic midline. **(F)** The  
749 expression pattern splits into several domains in late elongating germ bands, with expression  
750 domains in the putative neuroectoderm (white arrow, presumably including parts of the pars  
751 intercerebralis; Posnien 2011) and in the labral/stomodeal region (white empty arrowhead). **(G)** The  
752 expression domains flanking the prospective stomodeum become more prominent (empty arrow).  
753 **(H)** The anterior median expression domain frames the lateral parts of the labral buds (white empty  
754 arrowhead). **(I, J)** At fully elongated to early retracting germ band stages the two expression domains  
755 flanking the stomodeum are posteriorly linked to each other (empty arrow) and the expression  
756 domains within the labral buds are getting narrower. **(K)** The staining with the more sensitive TSA-  
757 Dylight550 (*Tc-foxQ2<sup>FLUO</sup>*) reveals four dot-like expression domains in the ocular region (black empty  
758 arrowheads). **(L)** At retracting germ band stages *Tc-foxQ2* is expressed in a narrow U-shape pattern  
759 and the neuroectodermal expression domains are reduced in size (white arrow).

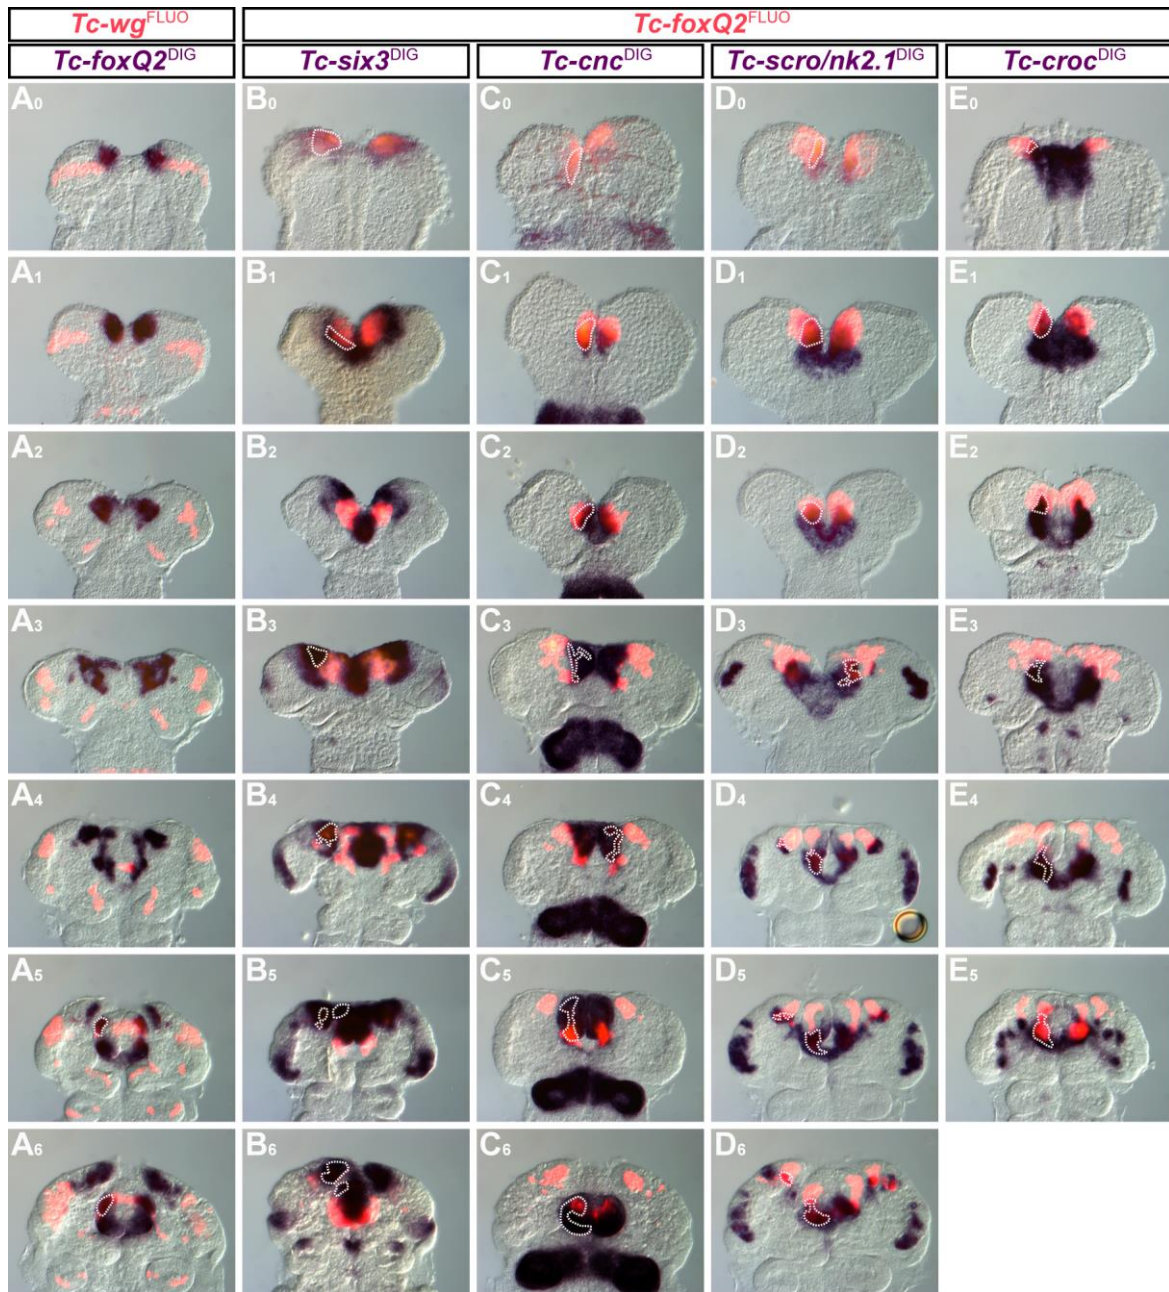

760

761 **Fig. 5. Co-expression analyses of *Tc-foxQ2* and anterior head patterning genes I.** Anterior is up.  
 762 Expression is visualized by double ISH (DISH), using NBT/BCIP (blue) and TSA-Dylight550 (red). For  
 763 better comparison and potential TSA signal quenching effects by NBT/BCIP staining, *Tc-foxQ2* was  
 764 stained using NBT/BCIP in **A<sub>0-6</sub>**. Co-expression is indicated with dashed lines. (**A<sub>0-6</sub>**) Until fully  
 765 elongated germ band stages no *Tc-foxQ2*/*Tc-wg* co-expression is detectable (**A<sub>0-4</sub>**). At later stages *Tc-*  
 766 *foxQ2* is co-expressed with *Tc-wg* in the anterior portion of the labral buds (**A<sub>5</sub>**, **A<sub>6</sub>**). (**B<sub>0-6</sub>**) *Tc-foxQ2*  
 767 and *Tc-six3* are completely overlapping in their expression at germ rudiment stages (**B<sub>0</sub>**). In early  
 768 elongating germ bands the co-expression is limited to a narrow lateral stripe of the AMR (**B<sub>1</sub>**).  
 769 Intermediate germ bands show a mutually exclusive expression of *Tc-foxQ2* and *Tc-six3*, within the

770 AMR (**B**<sub>2</sub>). At later stages *Tc-foxQ2* and *Tc-six3* expression are overlapping within the neurogenic  
771 region (**B**<sub>3-4</sub>). In early retracting germ bands and at later stages *Tc-foxQ2* and *Tc-six3* expression  
772 additionally overlap in the anterior portion of the labral buds (**B**<sub>5-6</sub>). (**C**<sub>0-6</sub>) *Tc-cnc* expression is almost  
773 completely covering the expression of *Tc-foxQ2*, at early embryonic stages (**C**<sub>0-2</sub>). At later stages the  
774 co-expression is restricted to parts of the labral/stomodeal region (**C**<sub>3-6</sub>). (**D**<sub>0-6</sub>) *Tc-scro/nk2.1* is  
775 partially co-expressed with *Tc-foxQ2* within the anterior part of the AMR at early embryonic stages  
776 (**D**<sub>0-2</sub>). In late elongating germ bands the co-expression is restricted to a narrow lateral stripe of the  
777 AMR (**D**<sub>3</sub>). Later stages show co-expression of *Tc-scro/nk2.1* and *Tc-foxQ2* in the posterior portion of  
778 the labral buds, the stomodeum flanking region and small areas of the neurogenic region (**D**<sub>4-6</sub>). *Tc-*  
779 *croc* expression is partially overlapping with *Tc-foxQ2* within antero-lateral parts of the AMR at early  
780 stages (**E**<sub>0-2</sub>). At later stages of development the *Tc-foxQ2/Tc-croc* co-expression is restricted to the  
781 stomodeum flanking region and the posterior portion of the labral buds (**E**<sub>3-5</sub>).

782



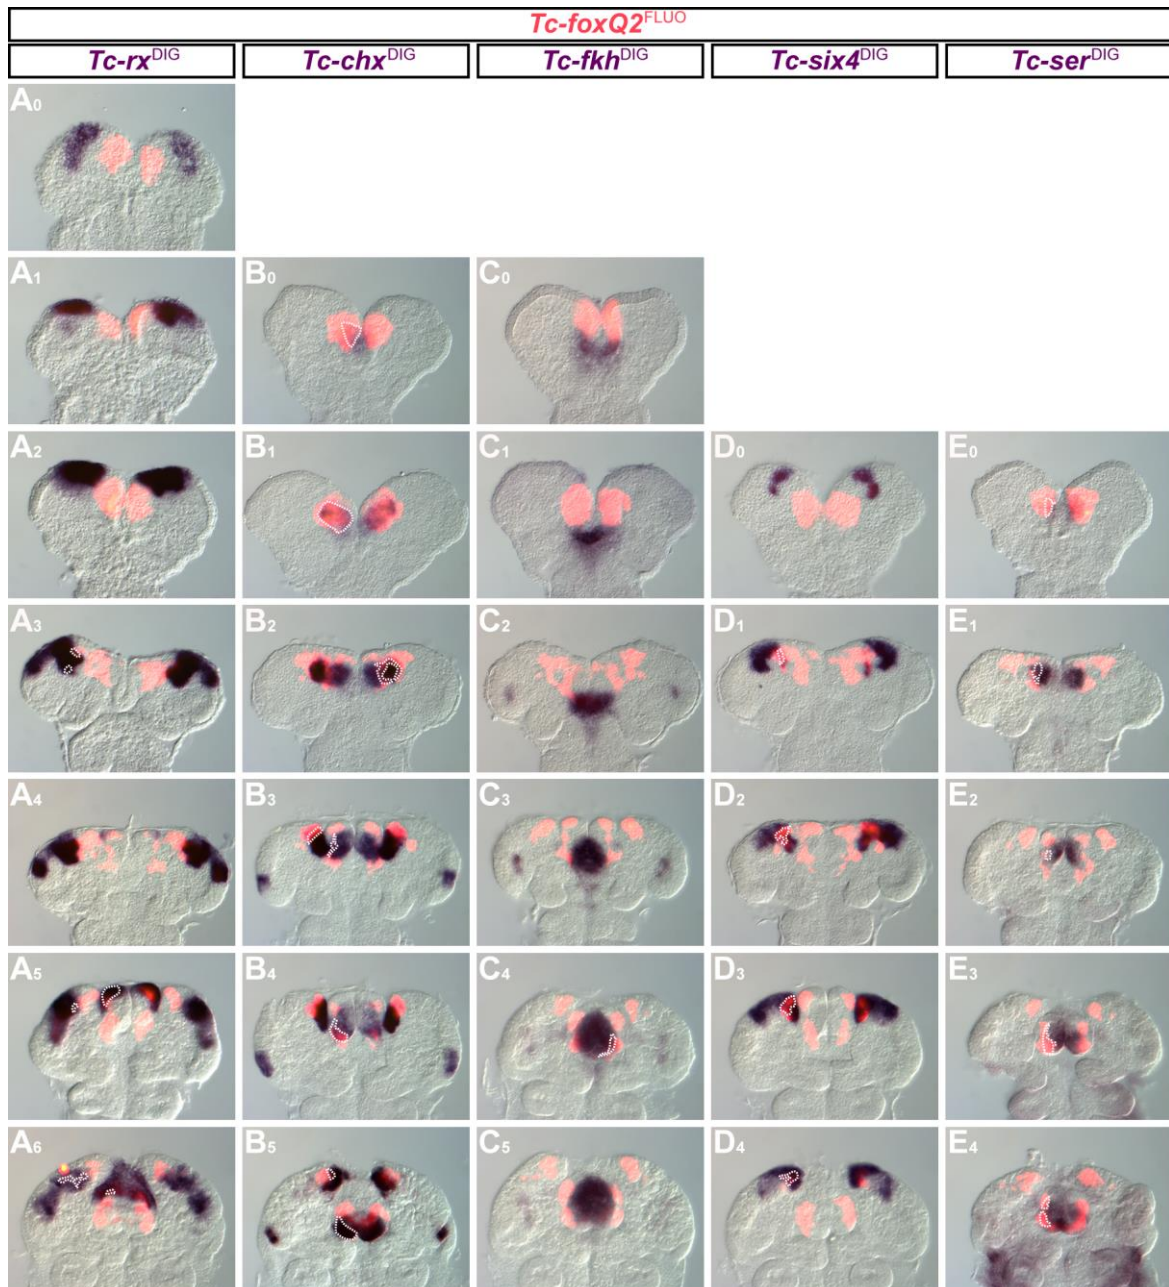

783

784 **Fig. 6. Co-expression analyses of *Tc-foxQ2* and anterior head patterning genes II.** Anterior is up.  
 785 Expression is visualized by DISH, using TSA-Dylight550 (red) and NBT/BCIP (blue). Co-expression is  
 786 indicated with dashed lines. (**A<sub>0-6</sub>**) *Tc-rx* is not co-expressed with *Tc-foxQ2* until fully elongated germ  
 787 band stages (**A<sub>0-4</sub>**), except for two little spots in the neurogenic region in late elongating germ bands  
 788 (**A<sub>3</sub>**). In retracting germ bands both genes are partially overlapping within the neurogenic region and  
 789 in anterior parts of the labral buds (**A<sub>5</sub>**, **A<sub>6</sub>**). (**B<sub>0-5</sub>**) *Tc-chx* expression is partially (**B<sub>0</sub>**) and later almost  
 790 completely (**B<sub>1</sub>**) overlapping with *Tc-foxQ2* expression. At later stages the co-expression is restricted  
 791 to narrow stripes within the outer lateral labral and the neurogenic region (**B<sub>2</sub>**, **B<sub>3</sub>**). In early retracting  
 792 germ bands *Tc-chx* expression shows only a little overlap within the posterior portion of the labral

793 buds (**B<sub>4</sub>**) and at later stages an additional overlap within the neurogenic region (**B<sub>5</sub>**). (**C<sub>0-5</sub>**) *Tc-fkh*  
 794 shows almost no co-expression with *Tc-foxQ2*, except for a small domain in the stomodeal region, in  
 795 early retracting germ bands (**C<sub>5</sub>**). (**D<sub>0-4</sub>**) *Tc-six4* is not co-expressed with *Tc-foxQ2*, in intermediate  
 796 elongating germ bands (**D<sub>0</sub>**). Co-expression starts in late elongating germ bands and is restricted to a  
 797 domain within the neurogenic region throughout the depicted stages (**D<sub>1-4</sub>**). (**E<sub>0-1</sub>**) *Tc-ser* is partially  
 798 co-expressed with *Tc-foxQ2* within a small sub-region of the AMR at elongating germ band stages  
 799 (**E<sub>0-1</sub>**). (**E<sub>2-4</sub>**) At later stages the co-expression is restricted to outer lateral parts of the labral buds.

800

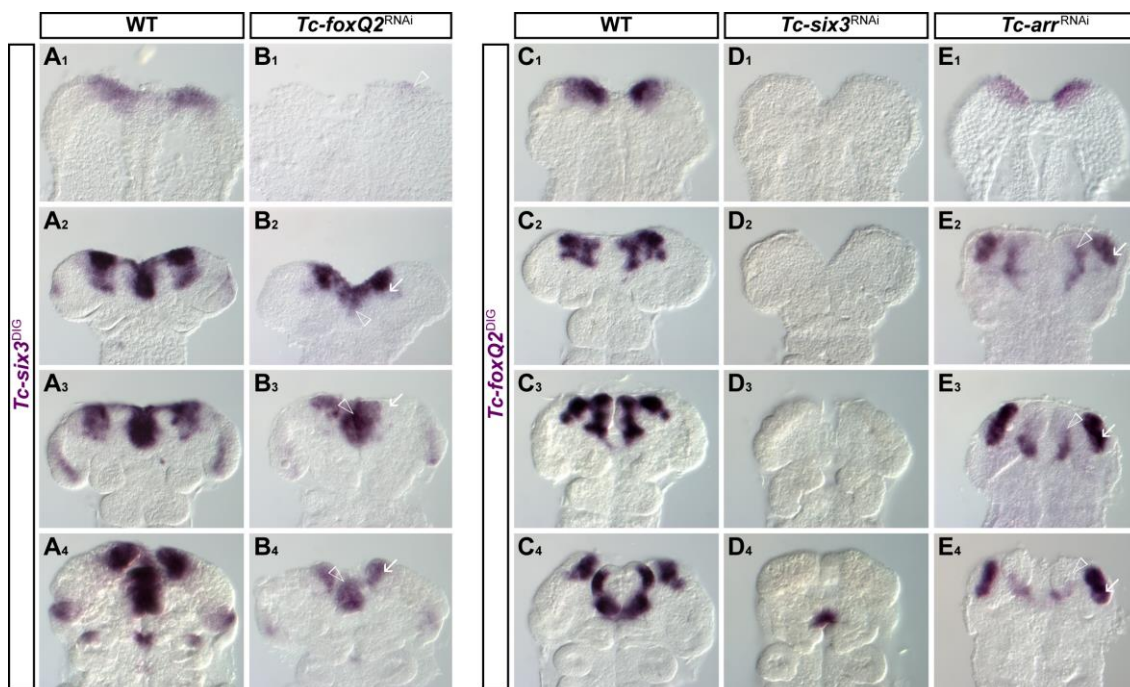

801

802 **Fig. 7. Mutual activation of *Tc-foxQ2* and *Tc-six3* and differential Wnt signaling-dependent *Tc-foxQ2***  
 803 **regulation.** Anterior is up. Expression pattern of *Tc-six3* in wt (**A<sub>1</sub>-A<sub>4</sub>**) and *Tc-foxQ2*<sup>RNAi</sup> (**B<sub>1</sub>-B<sub>4</sub>**)  
 804 embryos and expression pattern of *Tc-foxQ2* in wt (**C<sub>1</sub>-C<sub>4</sub>**), *Tc-six3*<sup>RNAi</sup> (**D<sub>1</sub>-D<sub>4</sub>**), and *Tc-arr*<sup>RNAi</sup> (**E<sub>1</sub>-E<sub>4</sub>**)  
 805 embryos monitored by ISH. (**B<sub>1</sub>**) *Tc-six3* expression is strongly reduced at *Tc-foxQ2*<sup>RNAi</sup> germ rudiment  
 806 stages (empty arrowhead). (**B<sub>2</sub>**) At later stages the median (empty arrowhead) and neurogenic  
 807 (**arrow**) *Tc-six3* expression domains are reduced in size. (**B<sub>3-4</sub>**) At fully elongated germ band and early  
 808 retracting germ band stages the labral (empty arrowhead) and the neuroectodermal (**arrow**) aspects  
 809 of expression are strongly reduced, while the posterior median domain persists. The ocular domain  
 810 appeared unchanged at late stages. (**D<sub>1</sub>-D<sub>3</sub>**) *Tc-foxQ2* expression is completely lost in early *Tc-six3*<sup>RNAi</sup>  
 811 embryos. (**D<sub>4</sub>**) The posterior portion of the stomodeal *Tc-foxQ2* expression domain emerges at  
 812 retracting *Tc-six3*<sup>RNAi</sup> germ band stages. (**E<sub>1</sub>**) *Tc-foxQ2* expression is unchanged at *Tc-arr*<sup>RNAi</sup> germ

813 rudiment stages. (E<sub>2</sub>-E<sub>4</sub>) At later stages the median *Tc-foxQ2* expression domain (empty arrowhead) is  
 814 reduced, whereas the neurogenic *Tc-foxQ2* expression domain is expanded (arrow).

815

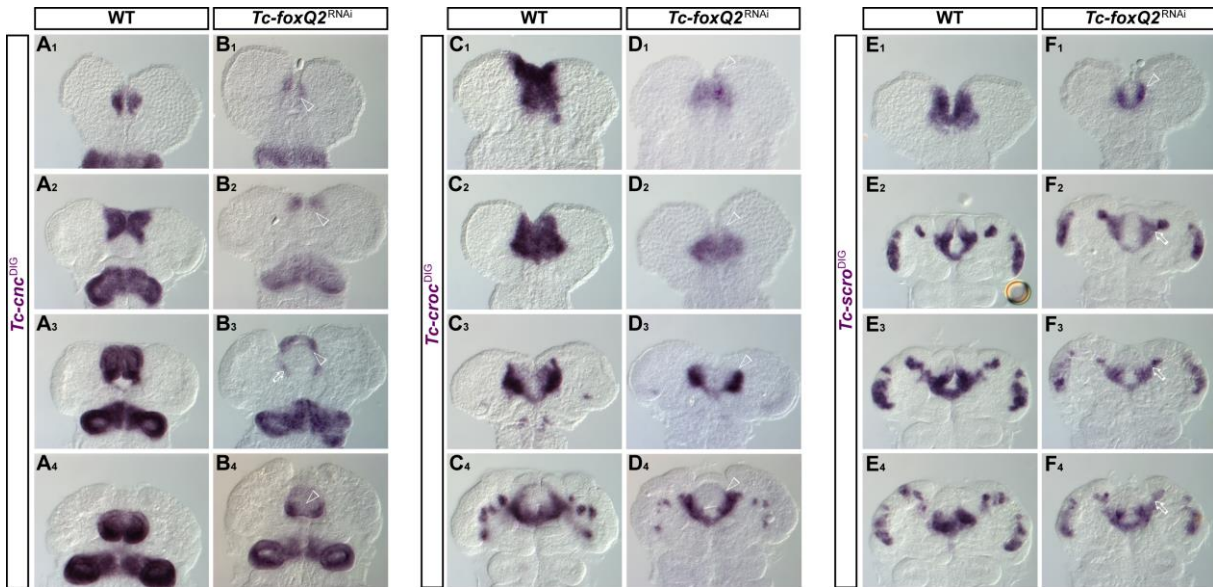

816

817 **Fig. 8. *Tc-foxQ2*<sup>RNAi</sup> embryos show reduced *Tc-cnc* and *Tc-croc* expression domains and altered *Tc-***  
 818 ***scro* expression.** Anterior is up. Expression pattern of *Tc-cnc* in wt (A<sub>1-4</sub>) and *Tc-foxQ2*<sup>RNAi</sup> (B<sub>1-4</sub>)  
 819 embryos, expression of *Tc-croc* in wt (C<sub>1-4</sub>) and *Tc-foxQ2*<sup>RNAi</sup> (D<sub>1-4</sub>) embryos, as well as expression of  
 820 *Tc-scro* in wt (E<sub>1-4</sub>) and *Tc-foxQ2*<sup>RNAi</sup> (F<sub>1-4</sub>) embryos monitored by ISH. (B<sub>1-2</sub>) In *Tc-foxQ2*<sup>RNAi</sup> embryos  
 821 the AMR expression domain of *Tc-cnc* is reduced posteriorly during germ band elongation (empty  
 822 arrowheads). Prior to this stage no considerable changes in the expression pattern were observed.  
 823 (B<sub>3</sub>) Fully elongated germ bands show reduction in the labral buds whereas the stomodeal expression  
 824 domain appears to be only slightly decreased (empty arrow). (B<sub>4</sub>) In retracting germ bands the  
 825 expression of *Tc-cnc* in the anterior and median region of the labral buds is strongly reduced (empty  
 826 arrowhead). (D<sub>1-4</sub>) Throughout development, *Tc-croc* expression pattern is lacking the anterior  
 827 portion of its AMR domain (empty arrowheads). (F<sub>1</sub>) Expression of *Tc-scro/nk2.1* is reduced to a  
 828 narrow stripe along the anterior fold (empty arrowhead). (F<sub>2-4</sub>) Later stages show an atypical bridging  
 829 between the labral/stomodeal and the neurogenic *Tc-scro/nk2.1* expression domains (empty  
 830 arrows).

831

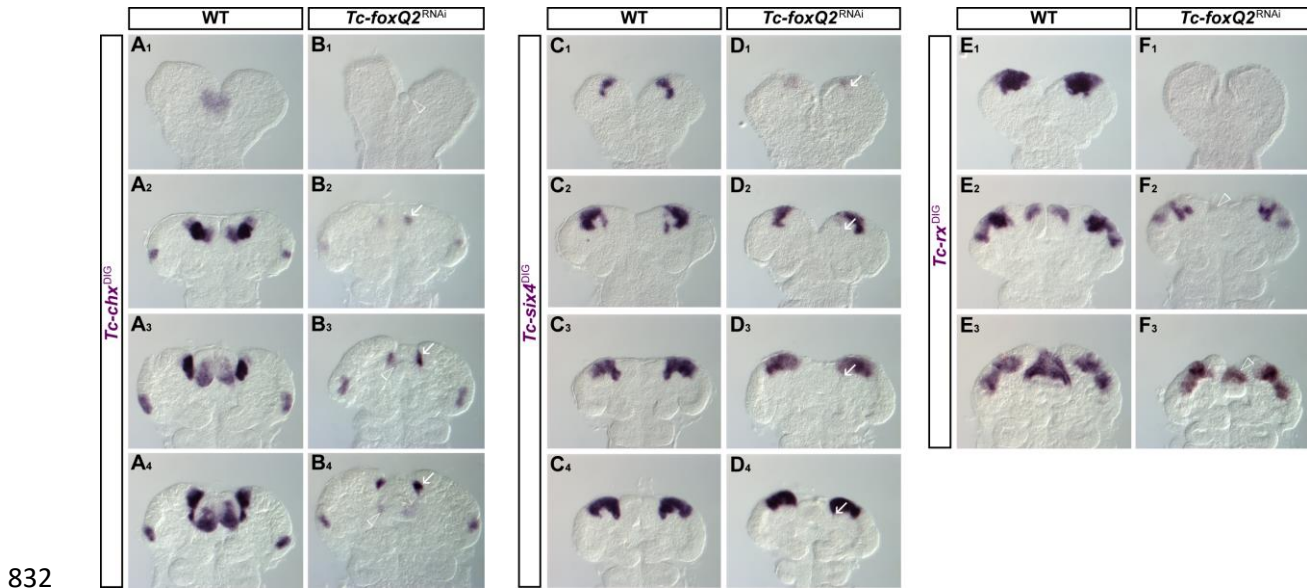

832

833 **Fig. 9. *Tc-foxQ2*<sup>RNAi</sup> embryos show reduced *Tc-chx*, *Tc-six4*, and *Tc-rx* expression domains.** Anterior  
834 is up. Expression patterns of *Tc-chx* in wt (**A**<sub>1-4</sub>) and *Tc-foxQ2*<sup>RNAi</sup> embryos (**B**<sub>1-4</sub>), of *Tc-six4* in wt (**C**<sub>1-4</sub>)  
835 and *Tc-foxQ2*<sup>RNAi</sup> embryos (**D**<sub>1-4</sub>) and of *Tc-rx* in wt (**E**<sub>1-3</sub>) and *Tc-foxQ2*<sup>RNAi</sup> embryos (**F**<sub>1-3</sub>) monitored by  
836 ISH. (**B**<sub>1</sub>) *Tc-chx* expression is completely absent in early elongating *Tc-foxQ2*<sup>RNAi</sup> germ bands (empty  
837 arrowhead). (**B**<sub>2-4</sub>) At later stages, the labral *Tc-chx* expression domains are almost absent (empty  
838 arrowheads) while the anterior neurogenic expression domains are strongly reduced (arrows). The  
839 ocular *Tc-chx* expression domains remain unaffected. (**D**<sub>1</sub>) Expression of *Tc-six4* is strongly reduced in  
840 early elongating germ bands (arrow). (**D**<sub>2-4</sub>) At later stages, the median posterior extensions of the *Tc-*  
841 *six4* expression domains are reduced (arrows). (**F**<sub>1</sub>) *Tc-rx* expression is strongly reduced or completely  
842 absent in early elongating *Tc-foxQ2*<sup>RNAi</sup> germ bands. (**F**<sub>2-3</sub>) At later stages the neurogenic *Tc-rx*  
843 expression pattern appears unaffected, but the labral expression domains are absent (**F**<sub>2</sub>: empty  
844 arrowhead) or reduced in size (**F**<sub>3</sub>: empty arrowhead).

845

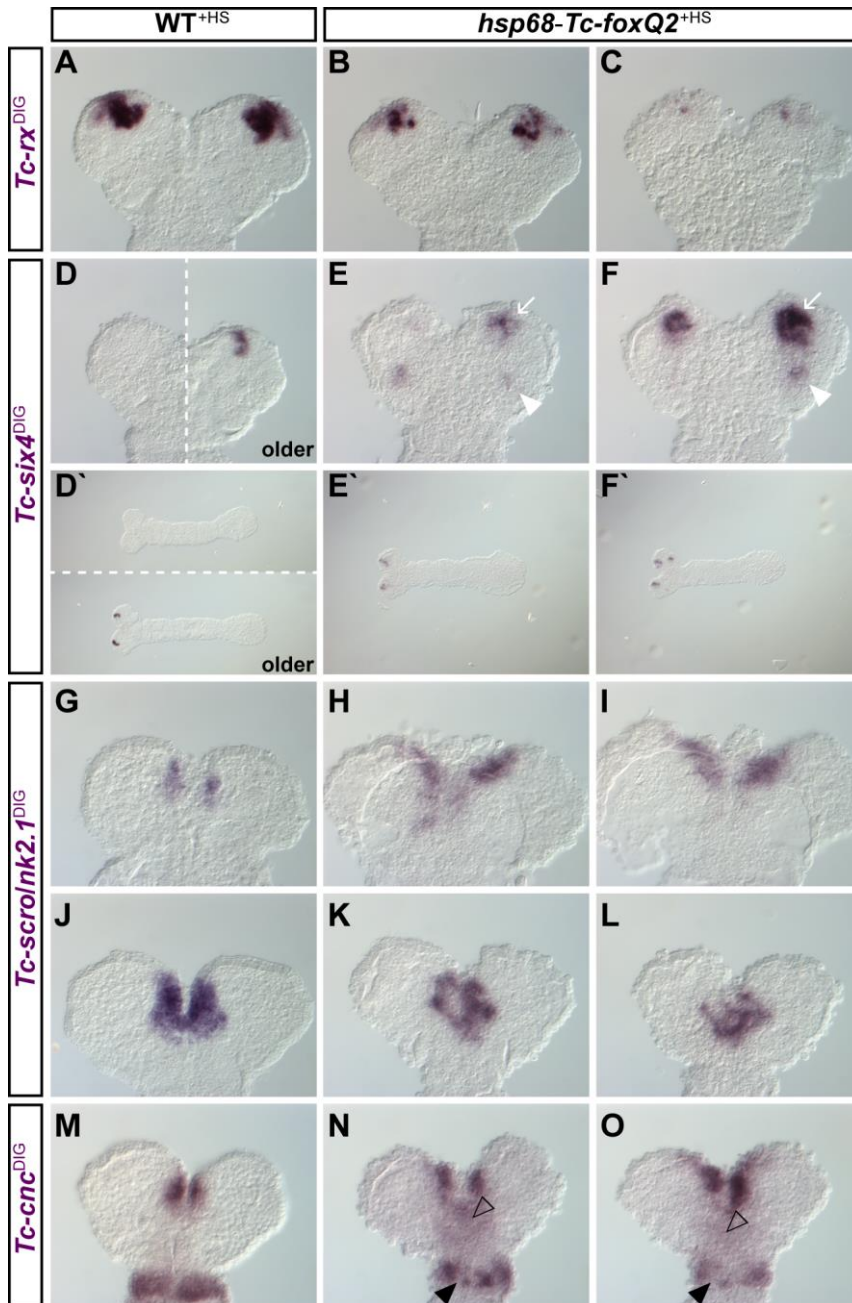

846

847 **Fig. 10. Ectopic *Tc-foxQ2* expression impacts head patterning gene expression profiles I.** Anterior is  
 848 up (left in D`-F`). Expression of head patterning genes in heat shock-treated wt (A, D, D`, G, J, M) and  
 849 *hsp68-Tc-foxQ2* (B, C, E, E`, F, F`, H, I, K, L, N, O) embryos (14-18 h AEL) is monitored by ISH. (B, C)  
 850 Ectopic *Tc-foxQ2* expression leads to slightly (B) and heavily (C) reduced *Tc-rx* expression domains. (E,  
 851 E`, F, F`) *Tc-six4* expression shows a premature onset (compare E`, F` with D`) at the anterior tip  
 852 (arrows), in *hsp68-Tc-foxQ2*<sup>+HS</sup> embryos. These premature expression domains are expanded (F:  
 853 arrow) compared to the size of the wt domains. Further, *hsp68-Tc-foxQ2*<sup>+HS</sup> embryos show an  
 854 additional *Tc-six4* expression domain within the antennal segment (white arrowhead). (H, I) The *Tc-*

855 *scro/nk2.1* expression domains are, in *hsp68-Tc-foxQ2<sup>HS</sup>* germ rudiments, prematurely expressed  
 856 and expanded. (K, L) In contrast, early elongating germ bands show reduced *Tc-scro/nk2.1* expression  
 857 domains, in *hsp68-Tc-foxQ2<sup>HS</sup>* embryos. The later effect is presumably a secondary effect. (N, O) The  
 858 anterior median *Tc-cnc* expression domains appear to be posteriorly spread (N: black empty  
 859 arrowhead) and expanded in *hsp68-Tc-foxQ2<sup>HS</sup>* embryos (O: white empty arrowhead). The  
 860 mandibular *Tc-cnc* expression domain is slightly (N) or heavily (O) reduced in a spotty manner, after  
 861 ectopic *Tc-foxQ2* expression (black arrowheads).

862

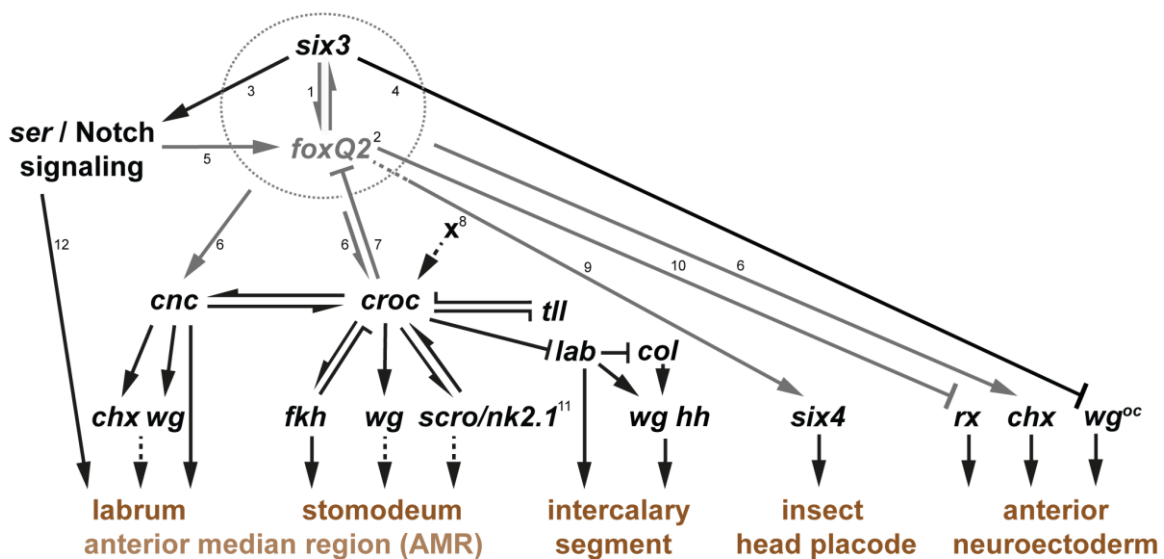

863

864 **Fig. 11. *Tc-foxQ2* forms an upstream regulatory module together with *Tc-six3*.** Black lines indicate  
 865 previously reported interactions (Based on (Kittelman et al., 2013; Posnien et al., 2011c; Schaeper  
 866 et al., 2010; Siemanowski et al., 2015)). Arrows represent gene activation, and cross-bars gene  
 867 repression. Dashed lines indicate hypothetical effects. This aGRN represents the interactions  
 868 between these genes at early embryonic stages – later interactions may differ (see text for details).  
 869 (1) *Tc-six3* is the most upstream factor for patterning the anterior median head and neuroectoderm.  
 870 (2) *Tc-foxQ2*, like *Tc-six3*, is a key player in anterior head development with a somewhat later onset  
 871 of expression than *Tc-six3*, but similar cuticle phenotypes (epidermal & neural), and comparable  
 872 activities in patterning of the anterior head. Mutual activation and similar phenotypes suggest that  
 873 they form a regulatory module (indicated by the dashed circle). (3) *Tc-six3* acts on Notch signaling via  
 874 *Tc-ser*. (4) *Tc-six3* prevents the ocular *Tc-wg* domain from expansion into the AMR, but is not acting  
 875 on other *Tc-wg* domains. (5) Notch signaling-dependent activation of *Tc-foxQ2* is restricted to lateral

876 parts of the anterior median *Tc-foxQ2* domains (*Tc-mib1* data). **(6)** Regulative activity is similar  
877 between *Tc-foxQ2* and *Tc-six3* with respect to several downstream targets. **(7)** *Tc-foxQ2* but not *Tc-*  
878 *six3* is repressed by *Tc-croc* activity. **(8)** An unknown factor 'X' is predicted to activate the posterior  
879 part of the *Tc-croc* expression, while *Tc-six3* and *Tc-foxQ2* are required for the anterior portion. **(9)**  
880 The interaction of *Tc-six3* with *Tc-six4* has not been tested – hence it may or may not be regulated by  
881 the *Tc-foxQ2/Tc-six3* regulatory module (dashed line). **(10)** *Tc-rx* is repressed by *Tc-foxQ2* ectopic  
882 expression but is not regulated by *Tc-six3*. **(11)** The late effect of *Tc-foxQ2* on *Tc-scro/nk2.1*, observed  
883 in gain-of-function experiments, is most likely secondary and is, hence, not considered here. **(12)**  
884 Notch signaling is involved in labrum development by regulating cell proliferation.

885

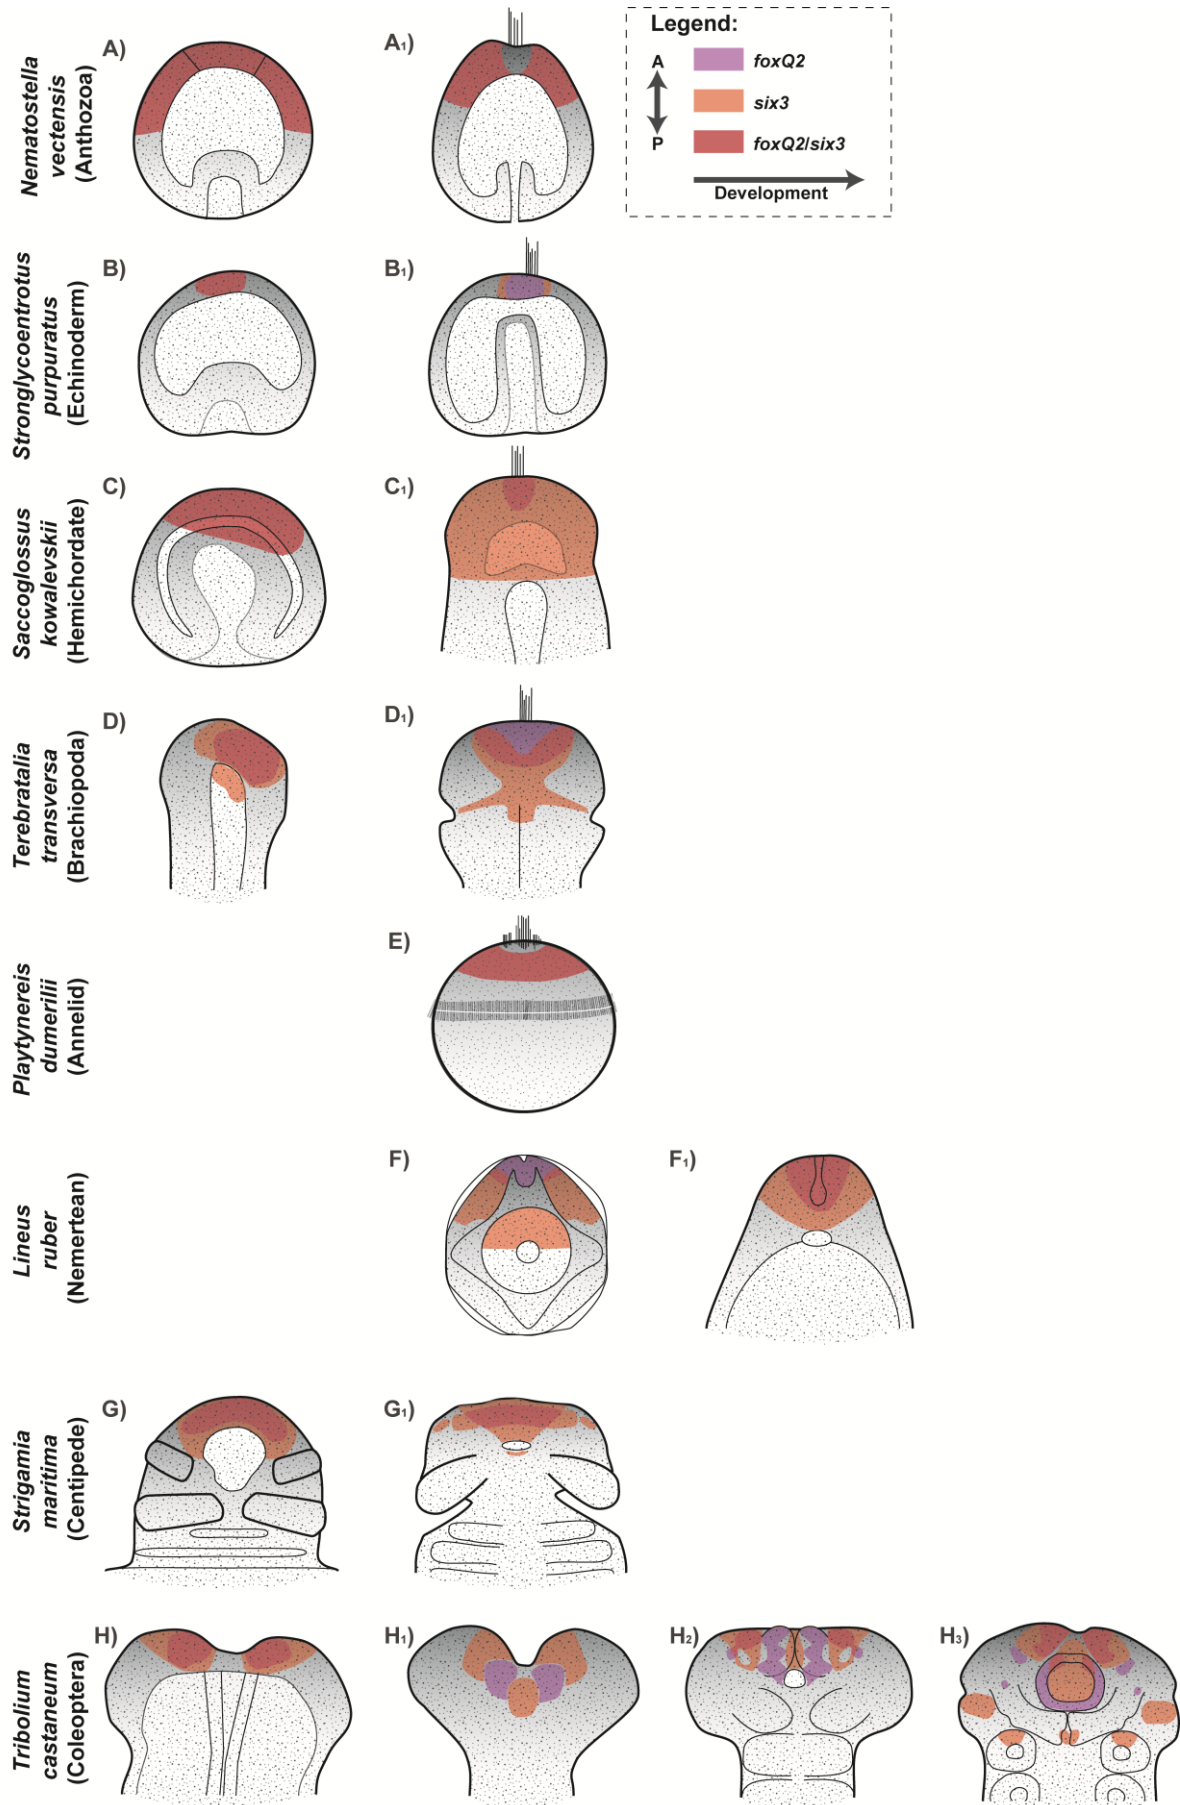



887 **Fig. 12. Expression of *foxQ2/six3* orthologs in different Metazoa.** *foxQ2* (purple) and *six3* (orange)  
888 and their co-expression (red) at different developmental stages. The anterior/apical pole is oriented  
889 to the top. At early stages, co-expression of *foxQ2* and *six3* at the anterior pole of different metazoan  
890 species is highly conserved (left column). At later stages the patterns diverge leading to mutual  
891 exclusive expression in some taxa. (**A<sub>1</sub>**, **E**) *Nematostella* and *Platynereis* larvae show a *foxQ2/six3* co-  
892 expression during early stages like the other species, with the exception that the most apical region is  
893 free of *foxQ2/six3* expression. (**C<sub>1</sub>**, **F<sub>1</sub>**, **G<sub>1</sub>**) Late embryonic stages of *Saccoglossus* and *Strigamia* as  
894 well as early *Lineus* juveniles show a *foxQ2* expression at the anterior/apical pole, which is  
895 completely covered by *six3* expression. (**B<sub>1</sub>**, **H<sub>1</sub>**) *Strongylocentrotus* late gastrulae and *Tribolium*  
896 elongating germ bands show mutually exclusive expression of *foxQ2* and *six3* at later stages. (**D<sub>1</sub>**, **F<sub>1</sub>**)  
897 Early tri-lobed *Terebratalia* larvae and *Lineus* Schmidt's larvae show *foxQ2* expression at the  
898 anterior/apical pole overlapping only posteriorly with *six3*. (**H<sub>2-3</sub>**) Fully elongated and retracting  
899 *Tribolium* germ bands show a complex expression pattern of *foxQ2* and *six3* with partial overlaps in  
900 the neuroectoderm (**H<sub>2-3</sub>**) and in the anterior labral buds (**H<sub>3</sub>**). (Based on (Fritzenwanker et al., 2014;  
901 Hunnekuhl and Akam, 2014; Marlow et al., 2014; Martín-Durán et al., 2015; Santagata et al., 2012;  
902 Sinigaglia et al., 2013; Tu et al., 2006; Wei et al., 2009); A: anterior, P: posterior

903
